# Supplementary material for: Neuron-associated retroelement-derived protein Arc/Arg3.1 assists in the early stages of alphaherpesvirus infection in human neuronal cells
Source: PubMed Central journal article supplement (PMC11637343; doi:10.1371/journal.pone.0314980), 2024-12-12
Supplement: pone.0314980.s002.pdf [file pone.0314980.s002.pdf]

## Results

| Sample Name            | Protein                                                             | gene | MW      | Score | Peptide | Coverage | Accession | Note*     |
|------------------------|---------------------------------------------------------------------|------|---------|-------|---------|----------|-----------|-----------|
| TAP_Arc-PRV<br>_150kDa | 1 Major capsid protein<br>[Suid herpesvirus 1 (Pseudorabies virus)] | MCP  | 145,938 | 632   | 17      | 17       | Q00705    | MCP_SUHVS |

*Note\* : Accession in Mascot Search Results*

TAP\_Arc-PRV\_150kDa- 1 Major capsid protein [Suid herpesvirus 1 (Pseudorabies virus)]

Mass: 145938 Score: 632 Matches: 17(4) Sequences: 17(4) emPAI: 0.10

| Query | Observed | Mr(expt) | Mr(calc) | Delta  | Miss | Score | Expect   | Rank | Unique | Peptide                   |                     |
|-------|----------|----------|----------|--------|------|-------|----------|------|--------|---------------------------|---------------------|
| 152   | 484.81   | 967.61   | 967.58   | 0.0249 | 0    | 27    | 1.90E+00 | 1    | U      | R.LAPATVAAVR.G            |                     |
| 190   | 531.33   | 1060.64  | 1060.62  | 0.0188 | 0    | 40    | 1.30E-01 | 1    | U      | R.LVFLEALEK.R             |                     |
| 194   | 539.25   | 1076.49  | 1076.49  | 0.0018 | 0    | 34    | 4.50E-01 | 1    | U      | K.AVSNMDDVAR.Y            |                     |
| 195   | 540.81   | 1079.60  | 1079.57  | 0.0323 | 0    | 33    | 4.80E-01 | 1    | U      | K.FFTPAAEVAK.S            |                     |
| 203   | 580.84   | 1159.66  | 1159.63  | 0.0307 | 0    | 59    | 1.50E-03 | 1    | U      | R.VACAAALVSELK.R          | +Carbamidomethyl(C) |
| 227   | 634.85   | 1267.69  | 1267.64  | 0.0406 | 0    | 84    | 4.20E-06 | 1    | U      | R.FATENVLFAEK.A           |                     |
| 233   | 639.34   | 1276.67  | 1276.64  | 0.0257 | 0    | 29    | 1.50E+00 | 1    | U      | R.NVQAVLDSFER.G           |                     |
| 258   | 458.93   | 1373.76  | 1373.76  | -0.003 | 0    | 17    | 2.10E+01 | 1    | U      | R.NVGGGLVHNRVPR.N         |                     |
| 275   | 507.27   | 1518.80  | 1518.76  | 0.0421 | 0    | 16    | 2.60E+01 | 2    | U      | R.HAGSFAPTPGLDPR.T        |                     |
| 279   | 531.96   | 1592.87  | 1592.83  | 0.0387 | 0    | 41    | 6.70E-02 | 1    | U      | R.TESGGGLHLQLTQPR.A       |                     |
| 284   | 836.95   | 1671.89  | 1671.86  | 0.032  | 0    | 59    | 1.10E-03 | 1    | U      | R.LSDLVNCTAPSVAVAR.M      | +Carbamidomethyl(C) |
| 290   | 582.30   | 1743.88  | 1743.89  | -0.019 | 0    | 20    | 9.50E+00 | 1    | U      | R.TPLGAEHFQAQYLIR.D       |                     |
| 291   | 873.01   | 1744.01  | 1743.96  | 0.0585 | 0    | 49    | 9.00E-03 | 1    | U      | K.APPLSLLAPFTLYEGR.L      |                     |
| 294   | 897.45   | 1792.89  | 1792.83  | 0.0552 | 0    | 32    | 5.70E-01 | 1    | U      | R.ADENTLSYALMAGYFK.M      |                     |
| 296   | 606.97   | 1817.89  | 1817.85  | 0.0388 | 0    | 24    | 3.10E+00 | 1    | U      | R.DGPHPADQPVHNYMIK.R      |                     |
| 301   | 633.67   | 1898.00  | 1897.95  | 0.0464 | 0    | 38    | 1.30E-01 | 1    | U      | R.YLLGEPAPDDGKPVGSAR.V    |                     |
| 318   | 611.31   | 2441.22  | 2441.21  | 0.0174 | 0    | 37    | 1.10E-01 | 1    | U      | R.AAAQHVPCVPHFLGANYATVR.Q | +Carbamidomethyl(C) |

**Protein View: MCP\_SUHVS**

Major capsid protein OS=Suid herpesvirus 1 (strain Indiana S) OX=31522 GN=MCP PE=3 SV=1

Database: SwissProt  
 Score: 632  
 Monoisotopic mass (M<sub>r</sub>): 145844  
 Calculated pI: 6.03  
 Taxonomy: Suid herpesvirus 1 (strain Indiana S)

Sequence similarity is available as [an NCBI BLAST search of MCP\\_SUHVS against nr](#).

**Search parameters**

MS data file: mas87B.tmp  
 Enzyme: Trypsin: cuts C-term side of KR unless next residue is P.  
 Variable modifications: Carbamidomethyl (C), Oxidation (M)

**Protein sequence coverage: 17%**

Matched peptides shown in **bold red**.

1 MERPAILPSG QILSNIEVHS HRALFDIFKR FRSDNNLYG AEFDALLGTY  
 51 CSTLSLVRFL ELGLSVACVC TKFPELSYVA EGTIQFEVQQ PMIAR**DGPH**  
 101 **ADQPVHNYMI** KRLDRSLNA AFSIAVEALG LISGENLDGT HISSAMRLRA  
 151 IQQLARNVQA **VLDSFER**GTA DQMLRVLMEK **APPLSLLAPF** **TYEGR**LADR  
 201 **VACAALVSEL** KRRVRDDTFF LTKHERNKDA VLDR**LSDLVN** **CTAPSAVAR**  
 251 MTHADTQGRP VDGVLVTTAG VRQRLHHVVL TLADTHADVP VTYGEMVIAN  
 301 TNLVLTALVMG **KAVSNMDDVA** **RYLLGGEPAP** **DDGKPVGSAR** VRADLVVVG  
 351 **LVFLEALEK** RVYQATQVPY PLVGNLDVTF VMPLGVFKPA ADYAR**HAGS**  
 401 **FAPTPGLPDP** RTHPPRAVHF FNKDGVPCHV TFEHAMGTLC HPSFLDVSAT  
 451 LAALRQEPAE VQCAFAYVA DARPDALVGL MQRFLIEWPG MMPVRPRWAA  
 501 PAAADQLLAP GNADLRLELH PAFDFVVAPE VDVPGPFVAVP QVMGQVRAMP  
 551 RIINGNIPLA LCPVDFRDAR GFELSVDRHR **LAPATVAAVR** GAFRDANYPM  
 601 VFYIEAVIH GSERTFCALA RLVAQCIQSY WRNTHNAAFV NNFYVMYIN  
 651 TYLNGELPE DCAAVYKDLL EHVHALRRLI GEFTLPGDPL GNQPQELNH  
 701 ALADATLLPP LIWDCDPIY RDGLAERLPE LRVNGAHFQH ILWVEMAQVN  
 751 **FRNVGGGLVH** **NRPVR**NENQP LHPHHDAEWS VLSKIYYAV VPAFSRGNCC  
 801 TMGVRYDRVY QLVQTMVVEPE TDEEVGTDDP RHPLHPRNLV PNSLNVLFHN  
 851 ACVAVDADAM LILQETVNM AERTTPLLAS VAPDAGMATV ATRDMRTHDG  
 901 SLHHGLLMA YQPNATLLE GAFFYPAPVN ALFACADHLG AMRDVGAEVR  
 951 **AAAQHVPCVP** **HFLGANYYAT** **VRQPVAQHAA** **QSRADENTLS** **YALMAGYFKM**  
 1001 SPVAFTHQLR RQLHPGFALT VVRQDR**FATE** **NVLF**AEKASE SYFMGMQVA  
 1051 **TESGGGLHL** **QLTQPR**ANVD LGVGFATAAYA AAALRAPVTD MGNLPQNLFA  
 1101 TRGAPMLDA DADDYLRRTV NAGNRLAPVP VFGQMLPQVP AGLARGQQSV  
 1151 CEFIATPVSV DLAYFRRACN PRGRAAGEVH GEEGLMFDHS HADPAHPHRA  
 1201 TANPWASQRH SYADRLYNGQ YNMSGPAYSP CFK**FTPAEA** **VAKSR**LARL  
 1251 IADTGAASP TSNGEYQFKR PVGAGELVED PCALFQEAYP PLCASDSALL  
 1301 **RPLGAEHF** **AQYLIR**DESP LKGCFOHASA

Unformatted sequence string: **1330 residues** (for pasting into other applications).

Sort by  residue number  increasing mass  decreasing mass  
 Show  matched peptides only  predicted peptides also

| Query               | Start - End | Observed | Mr (expt) | Mr (calc) | Delta M | Score | Expect  | Rank | U | Peptide                                             |
|---------------------|-------------|----------|-----------|-----------|---------|-------|---------|------|---|-----------------------------------------------------|
| <a href="#">296</a> | 96 - 111    | 606.9708 | 1817.8907 | 1817.8519 | 0.0388  | 0 24  | 3.1     | 1    | U | R.DGPHPADQPVHNYMIK.R                                |
| <a href="#">233</a> | 157 - 167   | 639.3407 | 1276.6668 | 1276.6412 | 0.0257  | 0 29  | 1.5     | 1    | U | R.NVQAVLDSFER.G                                     |
| <a href="#">291</a> | 181 - 196   | 873.0145 | 1744.0144 | 1743.9559 | 0.0585  | 0 49  | 0.009   | 1    | U | K.APPLSLLAPFTLYEGR.L                                |
| <a href="#">203</a> | 201 - 211   | 580.8362 | 1159.6578 | 1159.6271 | 0.0307  | 0 59  | 0.0015  | 1    | U | R.VACAALVSELK.R<br>+ Carbamidomethyl (C)            |
| <a href="#">284</a> | 235 - 250   | 836.9540 | 1671.8934 | 1671.8614 | 0.0320  | 0 59  | 0.0011  | 1    | U | R.LSDLVNCTAPSAVAR.M<br>+ Carbamidomethyl (C)        |
| <a href="#">194</a> | 312 - 321   | 539.2542 | 1076.4938 | 1076.4920 | 0.0018  | 0 34  | 0.45    | 1    | U | K.AVSNMDDVAR.Y                                      |
| <a href="#">301</a> | 322 - 340   | 633.6739 | 1897.9998 | 1897.9534 | 0.0464  | 0 38  | 0.13    | 1    | U | R.YLLGGEPAPDDGKPVGSAR.V                             |
| <a href="#">190</a> | 352 - 360   | 531.3251 | 1060.6356 | 1060.6168 | 0.0188  | 0 40  | 0.13    | 1    | U | R.LVFLEALEK.R                                       |
| <a href="#">275</a> | 397 - 411   | 507.2739 | 1518.8000 | 1518.7579 | 0.0421  | 0 16  | 26      | 2    | U | R.HAGSFAPTPGLPDP.R                                  |
| <a href="#">152</a> | 581 - 590   | 484.8105 | 967.6064  | 967.5815  | 0.0249  | 0 27  | 1.9     | 1    | U | R.LAPATVAAVR.G                                      |
| <a href="#">258</a> | 753 - 765   | 458.9278 | 1373.7615 | 1373.7640 | -0.0025 | 0 17  | 21      | 1    | U | R.NVGGGLVHNRPVR.N                                   |
| <a href="#">318</a> | 951 - 972   | 611.3132 | 2441.2237 | 2441.2063 | 0.0174  | 0 37  | 0.11    | 1    | U | R.AAAQHVPCVPHFLGANYYATVR.Q<br>+ Carbamidomethyl (C) |
| <a href="#">294</a> | 984 - 999   | 897.4520 | 1792.8894 | 1792.8342 | 0.0552  | 0 32  | 0.57    | 1    | U | R.ADENTLSYALMAGYFK.M                                |
| <a href="#">227</a> | 1027 - 1037 | 634.8500 | 1267.6855 | 1267.6448 | 0.0406  | 0 84  | 4.2e-06 | 1    | U | R.FATENVLFAEK.A                                     |
| <a href="#">279</a> | 1052 - 1066 | 531.9625 | 1592.8658 | 1592.8271 | 0.0387  | 0 41  | 0.067   | 1    | U | R.TESGGGLHLQLTQPR.A                                 |
| <a href="#">195</a> | 1234 - 1243 | 540.8060 | 1079.5974 | 1079.5651 | 0.0323  | 0 33  | 0.48    | 1    | U | K.FTPAEAVAK.S                                       |

| Query | Start - End | Observed | Mr (expt) | Mr (calc) | Delta M | Score | Expect | Rank | U | Peptide             |
|-------|-------------|----------|-----------|-----------|---------|-------|--------|------|---|---------------------|
| 290   | 1302 - 1316 | 582.2991 | 1743.8754 | 1743.8944 | -0.0190 | 0     | 20     | 9.5  | 1 | R.TPLGAEHFQAQYLIR.D |

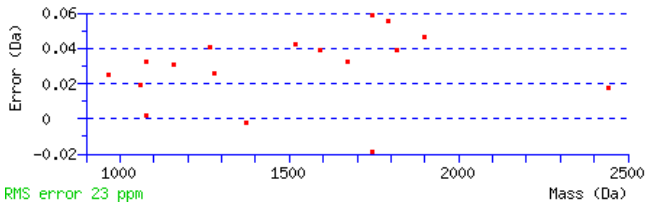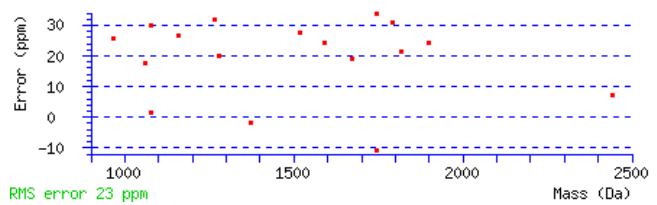

ID MCP\_SUHVS Reviewed; 1330 AA.  
AC Q00705;  
DT 01-APR-1993, integrated into UniProtKB/Swiss-Prot.  
DT 01-APR-1993, sequence version 1.  
DT 12-AUG-2020, entry version 59.  
DE RecName: Full=Major capsid protein {ECO:0000255|HAMAP-Rule:MF\_04016};  
DE Short=MCP {ECO:0000255|HAMAP-Rule:MF\_04016};  
GN Name=MCP {ECO:0000255|HAMAP-Rule:MF\_04016};  
OS Suid herpesvirus 1 (strain Indiana S) (SuHV-1) (Pseudorabies virus (strain  
OS Indiana S)).  
OC Viruses; Duplodnaviria; Heunggongvirae; Pploviricota; Herviviricetes;  
OC Herpesvirales; Herpesviridae; Alphaherpesvirinae; Varicellovirus.  
OX NCBI\_TaxID=31522;  
OH NCBI\_TaxID=9823; Sus scrofa (Pig).  
RN [1]  
RP NUCLEOTIDE SEQUENCE [GENOMIC DNA].  
RX PubMed=1718089; DOI=10.1016/0042-6822(91)90753-x;  
RA Yamada S., Imada T., Watanabe W., Honda Y., Nakajima-Iijima S., Shimizu Y.,  
RA Sekikawa K.;  
RT "Nucleotide sequence and transcriptional mapping of the major capsid  
RT protein gene of pseudorabies virus."  
RL Virology 185:56-66(1991).  
CC -!- FUNCTION: Self-assembles to form an icosahedral capsid with a T=16  
CC symmetry, about 200 nm in diameter, and consisting of 150 hexons and 12  
CC pentons (total of 162 capsomers). Hexons form the edges and faces of  
CC the capsid and are each composed of six MCP molecules. In contrast, one  
CC penton is found at each of the 12 vertices. Eleven of the pentons are  
CC MCP pentamers, while the last vertex is occupied by the portal complex.  
CC The capsid is surrounded by a layer of proteinaceous material  
CC designated the tegument which, in turn, is desiged in an envelope of  
CC host cell-derived lipids containing virus-encoded glycoproteins.  
CC {ECO:0000255|HAMAP-Rule:MF\_04016}.  
CC -!- SUBUNIT: Homomultimer. Makes the hexons and eleven out of twelve  
CC pentons. Interacts with triplex proteins 1/TRX1 and 2/TRX2; adjacent  
CC capsomers are linked together in groups of three by triplexes,  
CC heterotrimeric complexes composed of one molecule of TRX1 and two  
CC molecules of TRX2. Interacts with scaffold protein; this interaction  
CC allows efficient MCP transport to the host nucleus. Interacts with  
CC capsid vertex component 2/CVC2. Interacts with the small capsomere-  
CC interacting protein/SCP. {ECO:0000255|HAMAP-Rule:MF\_04016}.  
CC -!- SUBCELLULAR LOCATION: Virion {ECO:0000255|HAMAP-Rule:MF\_04016}. Host  
CC nucleus {ECO:0000255|HAMAP-Rule:MF\_04016}.  
CC -!- SIMILARITY: Belongs to the herpesviridae major capsid protein family.  
CC {ECO:0000255|HAMAP-Rule:MF\_04016}.  
CC -----  
CC Copyrighted by the UniProt Consortium, see <https://www.uniprot.org/terms>  
CC Distributed under the Creative Commons Attribution (CC BY 4.0) License  
CC -----  
DR PIR; A40777; VCBES5.  
DR DIP; DIP-62100N; -.  
DR PRIDE; Q00705; -.  
DR GO; GO:0042025; C:host cell nucleus; IEA:UniProtKB-SubCell.  
DR GO; GO:0039622; C:T=16 icosahedral viral capsid; IEA:UniProtKB-UniRule.  
DR GO; GO:0005198; F:structural molecule activity; IEA:UniProtKB-UniRule.  
DR HAMAP; MF\_04016; HSV\_MCP; 1.  
DR InterPro; IPR000912; Herpes\_MCP.  
DR InterPro; IPR023233; Herpes\_MCP\_upper\_sf.  
DR Pfam; PF03122; Herpes\_MCP; 1.  
DR PRINTS; PR00235; HSVCAPSIDMCP.  
DR SUPFAM; SSF103417; SSF103417; 1.  
PE 3: Inferred from homology;  
KW Capsid protein; Host nucleus; T=16 icosahedral capsid protein; Virion.  
FT CHAIN 1..1330  
FT /note="Major capsid protein"  
FT /id="PRO\_0000115708"  
SQ SEQUENCE 1330 AA; 145938 MW; 4E228145F773A522 CRC64;  
MERPAILPSG QILSNIEVHS HRALFDIFKR FRSDNNLYG AEFDALLGTY CSTLSLVRFL  
ELGLSVACVC TKFPELSYVA EGTIQFEVQQ PMIARDGPHP ADQPVHNYMI KRLDRRSLNA  
AFSIAVEALG LISGENLDGT HISSAMRLRA IQQLARNVQA VLDSFERGTA DQMLRVLMEK  
APPLSLLAPF LTYEGRILADR VACAALVSEL KRRVRDITFF LTKHERNKDA VLDRLSDLVN  
CTAPSVAVAR MTHADTQGRP VDGVLVTTAG VRQRLHHLV TLADTHADVP VTYGEMVIAN  
TNLVLTALVMG KAVSNMDDVA RYLLGGEPAP DDGKPVGSAR VRADLVVVGD RLVFLEALEK  
RVYQATQVPY PLVGNLVDVF VMPLGVFKPA ADRYARHAGS FAPT PGLPDP RTHPPRAVHF  
FNKDGVPCHV TFEHAMGTLC HPSFLDVSAT LAALRQEPAE VQCAFAYVA DAREDALVGL  
MQRFLEEWPQ MMPVPRPWA AADQLLAP GNADLRLELH PAFDFVVAPE VDVPGPFVAVP  
QVMGQVRAMP RIINGNIPLA LCPVDFRDAR GFELSDVRHR LAPATVAAVR GAFRDANYPM  
VFYIEAVIH GSERTFCALA RLVAQCISY WRNTHNAAFV NNFYVMYIN TYLNGNELPE  
DCAAVYKDLL EHVHALRRLI GEFTPLGDP LNQPQELNH ALADATLLPP LIWDCDPILY  
RDGLAERLPE LRVNGRHFQH ILWVEMAQVN FRNVGGGLVH NRPVRNENQP LHPHDAEWS  
VLSKIYYAV VPAPSRGNCC TMGVRYDRVY QLVQTMVVPE TDEEVGTDPP RHPPLHPRNLV  
PNSNLVLFHN ACVAVDADAM LILQETVTNM AERTTPLLAS VAPDAGMATV ATRDMRTHDG

SLHHGLLMA YQNDATLLE GAFFYPAPVN ALFACADHLG AMRDVGAEVR AAAQHVPCVP  
HFLGANYAT VRQPVAQHAA QSRADENTLS YALMAGYFKM SPVAFTHQLR RQLHPGFALT  
VVRQDRFATE NVLFAEKASE SYFMGQMQVA RTESGGGLHL QLTQPRANVD LGVGFTAAYA  
AAALRAPVTD MGNLPQNLFA TRGAPPMLDA DADDYLRRTV NAGNRLAPVP VFGQMLPQVP  
AGLARGQSV CEFIATPVSV DLAYFRRACN PRGRAAGEVH GEEGLMFDHS HADFAHPHRA  
TANPWASQRH SYADRLYNQ YNMSGPAYSP CFKFFTPAEA VAKSRGLARL IADTGAAASP  
TSNGEYQFKR PVGAGELVED PCALFQEAYP PLCASDSALL RTPLGAEEHF AQYLIRDESP  
LKGCQHASA

Mascot: <http://www.matrixscience.com/>

# MASCOT Search Results

User : JPROS  
 Email : pro@jbios.co.jp  
 Search title : D:\JPROS\N094\150kDa\_8micro.wiff (sample number 1)  
 MS data file : mas87B.tmp  
 Database : SwissProt 2021\_03 (565254 sequences; 203850821 residues)  
 Timestamp : 3 Jul 2021 at 09:27:52 GMT  
 Protein hits : [MCP\\_SUHVS](#) Major capsid protein OS=Suid herpesvirus 1 (strain Indiana S) OX=31522 GN=MCP PE=3 SV=1  
[K2C1\\_PANTR](#) Keratin, type II cytoskeletal 1 OS=Pan troglodytes OX=9598 GN=KRT1 PE=2 SV=1  
[K1C9\\_HUMAN](#) Keratin, type I cytoskeletal 9 OS=Homo sapiens OX=9606 GN=KRT9 PE=1 SV=3  
[TRYP\\_PIG](#) Trypsin OS=Sus scrofa OX=9823 PE=1 SV=1  
[K22E\\_HUMAN](#) Keratin, type II cytoskeletal 2 epidermal OS=Homo sapiens OX=9606 GN=KRT2 PE=1 SV=2  
[K1C10\\_HUMAN](#) Keratin, type I cytoskeletal 10 OS=Homo sapiens OX=9606 GN=KRT10 PE=1 SV=6  
[K2C6B\\_HUMAN](#) Keratin, type II cytoskeletal 6B OS=Homo sapiens OX=9606 GN=KRT6B PE=1 SV=5  
[K2C8\\_MOUSE](#) Keratin, type II cytoskeletal 8 OS=Mus musculus OX=10090 GN=Krt8 PE=1 SV=4  
[K2C73\\_RAT](#) Keratin, type II cytoskeletal 73 OS=Rattus norvegicus OX=10116 GN=Krt73 PE=1 SV=1  
[K2CO\\_CHICK](#) Keratin, type II cytoskeletal cochlear OS=Gallus gallus OX=9031 PE=2 SV=1  
[K2C7\\_BOVIN](#) Keratin, type II cytoskeletal 7 OS=Bos taurus OX=9913 GN=KRT7 PE=2 SV=1  
[PEX1\\_HUMAN](#) Peroxisome biogenesis factor 1 OS=Homo sapiens OX=9606 GN=PEX1 PE=1 SV=1

## Mascot Score Histogram

Ions score is  $-10 \cdot \log(P)$ , where P is the probability that the observed match is a random event. Individual ions scores > 41 indicate identity or extensive homology ( $p < 0.05$ ). Protein scores are derived from ions scores as a non-probabilistic basis for ranking protein hits.

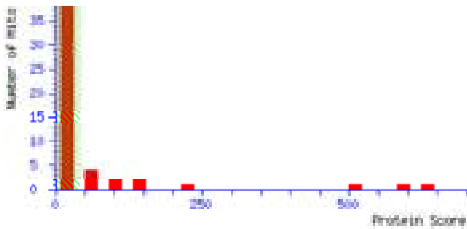

## Peptide Summary Report

Format As: Peptide Summary [Help](#)

Significance threshold  $p <$   Max. number of hits

Standard scoring  MudPIT scoring  Display non-significant matches  Show sub-sets

Show pop-ups  Suppress pop-ups  Sort unassigned Decreasing Score  Require bold red

Preferred taxonomy All entries

Error tolerant

1. [MCP\\_SUHVS](#) Mass: 145844 Score: 632 Matches: 17(4) Sequences: 17(4) emPAI: 0.10

Major capsid protein OS=Suid herpesvirus 1 (strain Indiana S) OX=31522 GN=MCP PE=3 SV=1

Check to include this hit in error tolerant search

| Query                                                   | Observed | Mr (expt) | Mr (calc) | Delta   | Miss | Score | Expect  | Rank | Unique | Peptide                                         |
|---------------------------------------------------------|----------|-----------|-----------|---------|------|-------|---------|------|--------|-------------------------------------------------|
| <input checked="" type="checkbox"/> <a href="#">152</a> | 484.8105 | 967.6064  | 967.5815  | 0.0249  | 0    | 27    | 1.9     | 1    | U      | R.LAPATVAVR.G                                   |
| <input checked="" type="checkbox"/> <a href="#">190</a> | 531.3251 | 1060.6356 | 1060.6168 | 0.0188  | 0    | 40    | 0.13    | 1    | U      | R.LVFLEALEK.R                                   |
| <input checked="" type="checkbox"/> <a href="#">194</a> | 539.2542 | 1076.4938 | 1076.4921 | 0.0018  | 0    | 34    | 0.45    | 1    | U      | K.AVSNMDDVAR.Y                                  |
| <input checked="" type="checkbox"/> <a href="#">195</a> | 540.8060 | 1079.5974 | 1079.5651 | 0.0323  | 0    | 33    | 0.48    | 1    | U      | K.FFTPAEAVAK.S                                  |
| <input checked="" type="checkbox"/> <a href="#">203</a> | 580.8362 | 1159.6578 | 1159.6271 | 0.0307  | 0    | 59    | 0.0015  | 1    | U      | R.VAQAALVSELK.R + Carbamidomethyl (C)           |
| <input checked="" type="checkbox"/> <a href="#">227</a> | 634.8500 | 1267.6855 | 1267.6448 | 0.0406  | 0    | 84    | 4.2e-06 | 1    | U      | R.FATENVLFAEK.A                                 |
| <input checked="" type="checkbox"/> <a href="#">233</a> | 639.3407 | 1276.6668 | 1276.6412 | 0.0257  | 0    | 29    | 1.5     | 1    | U      | R.NVQAVLDSFER.G                                 |
| <input checked="" type="checkbox"/> <a href="#">258</a> | 458.9278 | 1373.7615 | 1373.7640 | -0.0025 | 0    | 17    | 21      | 1    | U      | R.NVGGGLVHNR.PVR.N                              |
| <input checked="" type="checkbox"/> <a href="#">275</a> | 507.2739 | 1518.8000 | 1518.7579 | 0.0421  | 0    | 16    | 26      | 2    | U      | R.HAGSFAPTPGLPDP.R                              |
| <input checked="" type="checkbox"/> <a href="#">279</a> | 531.9625 | 1592.8658 | 1592.8271 | 0.0387  | 0    | 41    | 0.067   | 1    | U      | R.TESGGGLHLQLTQPR.A                             |
| <input checked="" type="checkbox"/> <a href="#">284</a> | 836.9540 | 1671.8934 | 1671.8614 | 0.0320  | 0    | 59    | 0.0011  | 1    | U      | R.LSDLVNCVAPVAVAR.M + Carbamidomethyl (C)       |
| <input checked="" type="checkbox"/> <a href="#">290</a> | 582.2991 | 1743.8754 | 1743.8944 | -0.0190 | 0    | 20    | 9.5     | 1    | U      | R.TPLGAEEHFAQYLIR.D                             |
| <input checked="" type="checkbox"/> <a href="#">291</a> | 873.0145 | 1744.0144 | 1743.9559 | 0.0585  | 0    | 49    | 0.009   | 1    | U      | K.APPLSLAPFTLYEGR.L                             |
| <input checked="" type="checkbox"/> <a href="#">294</a> | 897.4520 | 1792.8894 | 1792.8342 | 0.0552  | 0    | 32    | 0.57    | 1    | U      | R.ADENTLSYALMAGYFK.M                            |
| <input checked="" type="checkbox"/> <a href="#">296</a> | 606.9709 | 1817.8907 | 1817.8519 | 0.0388  | 0    | 24    | 3.1     | 1    | U      | R.DGHPADQPVHNYMIK.R                             |
| <input checked="" type="checkbox"/> <a href="#">301</a> | 633.6739 | 1897.9998 | 1897.9534 | 0.0464  | 0    | 38    | 0.13    | 1    | U      | R.YLLGGEPAPDDGKPVGSAR.V                         |
| <input checked="" type="checkbox"/> <a href="#">318</a> | 611.3132 | 2441.2237 | 2441.2063 | 0.0174  | 0    | 37    | 0.11    | 1    | U      | R.AAAQHVPCVPHFLGANYATVR.Q + Carbamidomethyl (C) |

2. [K2C1\\_PANTR](#) Mass: 65450 Score: 598 Matches: 22(7) Sequences: 15(7) emPAI: 0.46

Keratin, type II cytoskeletal 1 OS=Pan troglodytes OX=9598 GN=KRT1 PE=2 SV=1

Check to include this hit in error tolerant search

| Query                                                   | Observed | Mr (expt) | Mr (calc) | Delta  | Miss | Score | Expect | Rank | Unique | Peptide       |
|---------------------------------------------------------|----------|-----------|-----------|--------|------|-------|--------|------|--------|---------------|
| <input checked="" type="checkbox"/> <a href="#">124</a> | 437.7633 | 873.5120  | 873.4920  | 0.0200 | 0    | 27    | 2.6    | 1    | U      | R.SLVNLGGSK.S |
| <input checked="" type="checkbox"/> <a href="#">125</a> | 437.7722 | 873.5297  | 873.4920  | 0.0378 | 0    | (26)  | 3.7    | 1    | U      | R.SLVNLGGSK.S |
| <input checked="" type="checkbox"/> <a href="#">155</a> | 487.2774 | 972.5402  | 972.5240  | 0.0162 | 0    | (18)  | 21     | 4    | U      | K.IEISELNR.V  |
| <input checked="" type="checkbox"/> <a href="#">156</a> | 487.2835 | 972.5524  | 972.5240  | 0.0284 | 0    | 27    | 2.8    | 1    | U      | K.IEISELNR.V  |
| <input checked="" type="checkbox"/> <a href="#">178</a> | 517.2678 | 1032.5211 | 1032.5087 | 0.0124 | 0    | (13)  | 60     | 5    | U      | R.TLLEGEESR.M |
| <input checked="" type="checkbox"/> <a href="#">179</a> | 517.2799 | 1032.5453 | 1032.5087 | 0.0366 | 0    | 13    | 58     | 3    | U      | R.TLLEGEESR.M |
| <input checked="" type="checkbox"/> <a href="#">193</a> | 533.2699 | 1064.5252 | 1064.5138 | 0.0114 | 0    | 20    | 11     | 2    | U      | K.AQYEDIAQK.S |

|                                     |                     |          |           |           |         |   |      |         |   |   |                     |
|-------------------------------------|---------------------|----------|-----------|-----------|---------|---|------|---------|---|---|---------------------|
| <input checked="" type="checkbox"/> | <a href="#">200</a> | 563.2873 | 1124.5601 | 1124.5349 | 0.0251  | 0 | 36   | 0.28    | 1 | U | K.AEAESLYQSK.Y      |
| <input checked="" type="checkbox"/> | <a href="#">205</a> | 590.3127 | 1178.6109 | 1178.5931 | 0.0178  | 0 | (29) | 1.4     | 1 |   | K.YEELQITAGR.H      |
| <input checked="" type="checkbox"/> | <a href="#">206</a> | 590.3152 | 1178.6158 | 1178.5931 | 0.0227  | 0 | 44   | 0.048   | 1 |   | K.YEELQITAGR.H      |
| <input checked="" type="checkbox"/> | <a href="#">233</a> | 639.3407 | 1276.6668 | 1276.7027 | -0.0358 | 0 | 9    | 1.4e+02 | 4 | U | K.LALDLEIATYR.T     |
| <input checked="" type="checkbox"/> | <a href="#">249</a> | 651.8764 | 1301.7383 | 1301.7078 | 0.0305  | 0 | 60   | 0.001   | 1 |   | R.SLDDLSIIAEVK.A    |
| <input checked="" type="checkbox"/> | <a href="#">256</a> | 670.8534 | 1339.6923 | 1339.6619 | 0.0304  | 1 | 34   | 0.38    | 1 | U | K.SKAEAESLYQSK.Y    |
| <input checked="" type="checkbox"/> | <a href="#">260</a> | 692.3712 | 1382.7279 | 1382.6830 | 0.0449  | 0 | 83   | 5.1e-06 | 1 | U | K.SLNNQFASFIDK.V    |
| <input checked="" type="checkbox"/> | <a href="#">262</a> | 465.2602 | 1392.7587 | 1392.7249 | 0.0339  | 1 | 34   | 0.35    | 1 | U | R.TNAENEFVTIKK.D    |
| <input checked="" type="checkbox"/> | <a href="#">263</a> | 465.2641 | 1392.7704 | 1392.7249 | 0.0456  | 1 | (10) | 92      | 1 | U | R.TNAENEFVTIKK.D    |
| <input checked="" type="checkbox"/> | <a href="#">267</a> | 738.3922 | 1474.7699 | 1474.7416 | 0.0283  | 0 | (10) | 1.1e+02 | 1 | U | K.WELLQQVDTSTR.T    |
| <input checked="" type="checkbox"/> | <a href="#">268</a> | 738.4035 | 1474.7924 | 1474.7416 | 0.0508  | 0 | 42   | 0.058   | 1 | U | K.WELLQQVDTSTR.T    |
| <input checked="" type="checkbox"/> | <a href="#">269</a> | 738.4041 | 1474.7936 | 1474.7416 | 0.0520  | 0 | (21) | 8.6     | 1 | U | K.WELLQQVDTSTR.T    |
| <input checked="" type="checkbox"/> | <a href="#">270</a> | 738.4212 | 1474.8278 | 1474.7780 | 0.0498  | 0 | 67   | 0.00019 | 1 |   | R.FLEQQNQVLQTK.W    |
| <input checked="" type="checkbox"/> | <a href="#">281</a> | 546.9665 | 1637.8777 | 1637.8525 | 0.0251  | 1 | 42   | 0.053   | 1 | U | K.SLNNQFASFIDKVR.F  |
| <input checked="" type="checkbox"/> | <a href="#">304</a> | 665.3436 | 1993.0090 | 1992.9693 | 0.0396  | 0 | 64   | 0.00034 | 1 | U | R.THNLEPYFESFINLR.R |

Proteins matching the same set of peptides:

[K2C1\\_HUMAN](#) Mass: 65999 Score: 597 Matches: 22(7) Sequences: 15(7)  
Keratin, type II cytoskeletal 1 OS=Homo sapiens OX=9606 GN=KRT1 PE=1 SV=6

3. [K1C9\\_HUMAN](#) Mass: 62027 Score: 506 Matches: 18(5) Sequences: 12(5) emPAI: 0.33  
Keratin, type I cytoskeletal 9 OS=Homo sapiens OX=9606 GN=KRT9 PE=1 SV=3

Check to include this hit in error tolerant search

| Query                               | Observed            | Mr(expt)  | Mr(calc)  | Delta     | Miss   | Score | Expect | Rank    | Unique | Peptide |                                   |
|-------------------------------------|---------------------|-----------|-----------|-----------|--------|-------|--------|---------|--------|---------|-----------------------------------|
| <input checked="" type="checkbox"/> | <a href="#">132</a> | 449.2245  | 896.4345  | 896.4062  | 0.0283 | 0     | 28     | 1.5     | 1      | U       | R.MTLDDFR.I                       |
| <input checked="" type="checkbox"/> | <a href="#">133</a> | 449.2256  | 896.4366  | 896.4062  | 0.0304 | 0     | (16)   | 22      | 1      | U       | R.MTLDDFR.I                       |
| <input checked="" type="checkbox"/> | <a href="#">134</a> | 449.2385  | 896.4625  | 896.4062  | 0.0563 | 0     | (2)    | 4.9e+02 | 4      | U       | R.MTLDDFR.I                       |
| <input checked="" type="checkbox"/> | <a href="#">135</a> | 449.2388  | 896.4630  | 896.4062  | 0.0568 | 0     | (18)   | 12      | 1      | U       | R.MTLDDFR.I                       |
| <input checked="" type="checkbox"/> | <a href="#">188</a> | 530.8026  | 1059.5906 | 1059.5560 | 0.0345 | 0     | 36     | 0.34    | 1      | U       | K.TLLDIDNTR.M                     |
| <input checked="" type="checkbox"/> | <a href="#">189</a> | 530.8027  | 1059.5908 | 1059.5560 | 0.0348 | 0     | (24)   | 5.3     | 3      | U       | K.TLLDIDNTR.M                     |
| <input checked="" type="checkbox"/> | <a href="#">191</a> | 533.2566  | 1064.4986 | 1064.4920 | 0.0066 | 0     | 30     | 1.1     | 2      | U       | K.STMQELNSR.L                     |
| <input checked="" type="checkbox"/> | <a href="#">192</a> | 533.2695  | 1064.5244 | 1064.4920 | 0.0324 | 0     | (9)    | 1.2e+02 | 6      | U       | K.STMQELNSR.L                     |
| <input checked="" type="checkbox"/> | <a href="#">193</a> | 533.2699  | 1064.5252 | 1064.4920 | 0.0332 | 0     | (8)    | 1.7e+02 | 8      | U       | K.STMQELNSR.L                     |
| <input checked="" type="checkbox"/> | <a href="#">202</a> | 579.3089  | 1156.6032 | 1156.5836 | 0.0195 | 0     | 53     | 0.0063  | 1      | U       | R.QGVADINGLR.Q                    |
| <input checked="" type="checkbox"/> | <a href="#">208</a> | 595.8174  | 1189.6202 | 1189.6013 | 0.0189 | 0     | 40     | 0.12    | 1      | U       | R.QVLDNLTMEK.S                    |
| <input checked="" type="checkbox"/> | <a href="#">278</a> | 793.8977  | 1585.7809 | 1585.7583 | 0.0226 | 0     | 25     | 2.8     | 1      | U       | K.VQALEEANNLENK.I                 |
| <input checked="" type="checkbox"/> | <a href="#">297</a> | 613.3321  | 1836.9746 | 1836.9581 | 0.0164 | 0     | 36     | 0.22    | 1      | U       | R.HGVQLEIEIQSLSK.K                |
| <input checked="" type="checkbox"/> | <a href="#">299</a> | 617.9910  | 1850.9510 | 1850.9196 | 0.0314 | 1     | 32     | 0.5     | 1      | U       | K.TLNDMRQYEQLAK.N                 |
| <input checked="" type="checkbox"/> | <a href="#">314</a> | 767.0602  | 2298.1588 | 2298.1123 | 0.0465 | 1     | 59     | 0.00078 | 1      | U       | K.SDLEMQYETLQELMALKK.N            |
| <input checked="" type="checkbox"/> | <a href="#">317</a> | 793.0802  | 2376.2189 | 2376.1808 | 0.0381 | 1     | 51     | 0.0048  | 1      | U       | R.LASYLDKQVQALEEANNLENK.I         |
| <input checked="" type="checkbox"/> | <a href="#">322</a> | 968.1565  | 2901.4476 | 2901.4032 | 0.0444 | 1     | 48     | 0.0071  | 1      | U       | K.NYSPPYNTIDDLKQIVDLTVGNK.T       |
| <input checked="" type="checkbox"/> | <a href="#">323</a> | 1088.8542 | 3263.5407 | 3263.5066 | 0.0342 | 0     | 69     | 5.2e-05 | 1      | U       | K.DIENQYETQITQIEHEVSSSGQEVQSSAK.E |

4. [TRYP\\_PIG](#) Mass: 24394 Score: 211 Matches: 7(4) Sequences: 4(3) emPAI: 0.77  
Trypsin OS=Sus scrofa OX=9823 PE=1 SV=1

Check to include this hit in error tolerant search

| Query                               | Observed            | Mr(expt) | Mr(calc)  | Delta     | Miss    | Score | Expect | Rank    | Unique | Peptide |                                           |
|-------------------------------------|---------------------|----------|-----------|-----------|---------|-------|--------|---------|--------|---------|-------------------------------------------|
| <input checked="" type="checkbox"/> | <a href="#">89</a>  | 421.7710 | 841.5274  | 841.5022  | 0.0252  | 0     | 32     | 0.62    | 1      | U       | R.VATVSLPR.S                              |
| <input checked="" type="checkbox"/> | <a href="#">90</a>  | 421.7733 | 841.5320  | 841.5022  | 0.0298  | 0     | (27)   | 1.8     | 1      | U       | R.VATVSLPR.S                              |
| <input checked="" type="checkbox"/> | <a href="#">183</a> | 523.2802 | 1044.5459 | 1044.5564 | -0.0105 | 0     | (10)   | 1.3e+02 | 3      | U       | K.LSSPATLNSR.V                            |
| <input checked="" type="checkbox"/> | <a href="#">184</a> | 523.2964 | 1044.5782 | 1044.5564 | 0.0219  | 0     | 45     | 0.04    | 1      | U       | K.LSSPATLNSR.V                            |
| <input checked="" type="checkbox"/> | <a href="#">312</a> | 737.7190 | 2210.1350 | 2210.0967 | 0.0383  | 0     | 71     | 5.5e-05 | 1      | U       | R.LGEHNDVLEGNQFVINAAK.I                   |
| <input checked="" type="checkbox"/> | <a href="#">313</a> | 761.7499 | 2282.2277 | 2282.1729 | 0.0549  | 0     | 63     | 0.00031 | 1      | U       | K.IITHPNFNGNTLNDNDIMLIK.L                 |
| <input checked="" type="checkbox"/> | <a href="#">315</a> | 767.0713 | 2298.1920 | 2298.1678 | 0.0242  | 0     | (59)   | 0.00085 | 1      | U       | K.IITHPNFNGNTLNDNDIMLIK.L + Oxidation (M) |

5. [K22E\\_HUMAN](#) Mass: 65393 Score: 156 Matches: 6(2) Sequences: 3(2) emPAI: 0.12  
Keratin, type II cytoskeletal 2 epidermal OS=Homo sapiens OX=9606 GN=KRT2 PE=1 SV=2

Check to include this hit in error tolerant search

| Query                               | Observed            | Mr(expt) | Mr(calc)  | Delta     | Miss   | Score | Expect | Rank    | Unique | Peptide |                  |
|-------------------------------------|---------------------|----------|-----------|-----------|--------|-------|--------|---------|--------|---------|------------------|
| <input checked="" type="checkbox"/> | <a href="#">155</a> | 487.2774 | 972.5402  | 972.5240  | 0.0162 | 0     | (18)   | 21      | 4      |         | K.IEISELNR.V     |
| <input checked="" type="checkbox"/> | <a href="#">156</a> | 487.2835 | 972.5524  | 972.5240  | 0.0284 | 0     | 27     | 2.8     | 1      |         | K.IEISELNR.V     |
| <input checked="" type="checkbox"/> | <a href="#">253</a> | 665.3858 | 1328.7570 | 1328.7187 | 0.0383 | 0     | 63     | 0.00046 | 1      |         | R.NLDDLSIIAEVK.A |
| <input checked="" type="checkbox"/> | <a href="#">268</a> | 738.4035 | 1474.7924 | 1474.7780 | 0.0144 | 0     | (14)   | 38      | 2      |         | R.FLEQQNQVLQTK.W |
| <input checked="" type="checkbox"/> | <a href="#">269</a> | 738.4041 | 1474.7936 | 1474.7780 | 0.0156 | 0     | (11)   | 74      | 3      |         | R.FLEQQNQVLQTK.W |
| <input checked="" type="checkbox"/> | <a href="#">270</a> | 738.4212 | 1474.8278 | 1474.7780 | 0.0498 | 0     | 67     | 0.00019 | 1      |         | R.FLEQQNQVLQTK.W |

6. [K1C10\\_HUMAN](#) Mass: 58792 Score: 133 Matches: 4(1) Sequences: 4(1) emPAI: 0.06  
Keratin, type I cytoskeletal 10 OS=Homo sapiens OX=9606 GN=KRT10 PE=1 SV=6

Check to include this hit in error tolerant search

| Query                               | Observed            | Mr(expt) | Mr(calc)  | Delta     | Miss   | Score | Expect | Rank   | Unique | Peptide |                  |
|-------------------------------------|---------------------|----------|-----------|-----------|--------|-------|--------|--------|--------|---------|------------------|
| <input checked="" type="checkbox"/> | <a href="#">177</a> | 516.3094 | 1030.6042 | 1030.5910 | 0.0132 | 0     | 26     | 2.7    | 1      | U       | R.VLDELTLTK.A    |
| <input checked="" type="checkbox"/> | <a href="#">197</a> | 545.7855 | 1089.5564 | 1089.5237 | 0.0328 | 0     | 38     | 0.19   | 1      | U       | K.VTMQNLNDR.L    |
| <input checked="" type="checkbox"/> | <a href="#">259</a> | 691.3417 | 1380.6688 | 1380.6408 | 0.0280 | 0     | 56     | 0.0024 | 1      | U       | R.ALEESNYELEGK.I |
| <input checked="" type="checkbox"/> | <a href="#">272</a> | 498.6046 | 1492.7919 | 1492.7270 | 0.0650 | 1     | 13     | 52     | 1      | U       | R.SQYQLAEQNRK.D  |

7. [K2C6B\\_HUMAN](#) Mass: 60030 Score: 107 Matches: 3(2) Sequences: 2(2) emPAI: 0.13  
Keratin, type II cytoskeletal 6B OS=Homo sapiens OX=9606 GN=KRT6B PE=1 SV=5

Check to include this hit in error tolerant search

| Query               | Observed | Mr(expt)  | Mr(calc)  | Delta  | Miss | Score | Expect  | Rank | Unique | Peptide           |
|---------------------|----------|-----------|-----------|--------|------|-------|---------|------|--------|-------------------|
| <a href="#">205</a> | 590.3127 | 1178.6109 | 1178.5931 | 0.0178 | 0    | (29)  | 1.4     | 1    |        | K.YEELQITAGR.H    |
| <a href="#">206</a> | 590.3152 | 1178.6158 | 1178.5931 | 0.0227 | 0    | 44    | 0.048   | 1    |        | K.YEELQITAGR.H    |
| <a href="#">253</a> | 665.3858 | 1328.7570 | 1328.7187 | 0.0383 | 0    | 63    | 0.00046 | 1    |        | R.NLGLDLSIIAEVK.A |

8. [K2C8\\_MOUSE](#) Mass: 54531 Score: 83 Matches: 1(1) Sequences: 1(1) emPAI: 0.07  
 Keratin, type II cytoskeletal 8 OS=Mus musculus OX=10090 GN=Krt8 PE=1 SV=4  
 Check to include this hit in error tolerant search

| Query               | Observed | Mr(expt)  | Mr(calc)  | Delta  | Miss | Score | Expect  | Rank | Unique | Peptide         |
|---------------------|----------|-----------|-----------|--------|------|-------|---------|------|--------|-----------------|
| <a href="#">260</a> | 692.3712 | 1382.7279 | 1382.7194 | 0.0085 | 1    | 83    | 5.1e-06 | 1    | U      | K.SLNNKFAFIDK.V |

9. [K2C73\\_RAT](#) Mass: 60349 Score: 76 Matches: 4(1) Sequences: 2(1) emPAI: 0.06  
 Keratin, type II cytoskeletal 73 OS=Rattus norvegicus OX=10116 GN=Krt73 PE=1 SV=1  
 Check to include this hit in error tolerant search

| Query               | Observed | Mr(expt)  | Mr(calc)  | Delta   | Miss | Score | Expect  | Rank | Unique | Peptide          |
|---------------------|----------|-----------|-----------|---------|------|-------|---------|------|--------|------------------|
| <a href="#">233</a> | 639.3407 | 1276.6668 | 1276.7027 | -0.0358 | 0    | 9     | 1.4e+02 | 4    |        | K.LALDIEIATYR.K  |
| <a href="#">268</a> | 738.4035 | 1474.7924 | 1474.7780 | 0.0144  | 0    | (14)  | 38      | 2    |        | R.FLEQQNQVLQTK.W |
| <a href="#">269</a> | 738.4041 | 1474.7936 | 1474.7780 | 0.0156  | 0    | (11)  | 74      | 3    |        | R.FLEQQNQVLQTK.W |
| <a href="#">270</a> | 738.4212 | 1474.8278 | 1474.7780 | 0.0498  | 0    | 67    | 0.00019 | 1    |        | R.FLEQQNQVLQTK.W |

Proteins matching the same set of peptides:

[K2C73\\_MOUSE](#) Mass: 58875 Score: 75 Matches: 4(1) Sequences: 2(1)  
 Keratin, type II cytoskeletal 73 OS=Mus musculus OX=10090 GN=Krt73 PE=1 SV=1

10. [K2C0\\_CHICK](#) Mass: 53770 Score: 72 Matches: 2(1) Sequences: 2(1) emPAI: 0.07  
 Keratin, type II cytoskeletal cochlear OS=Gallus gallus OX=9031 PE=2 SV=1  
 Check to include this hit in error tolerant search

| Query               | Observed | Mr(expt)  | Mr(calc)  | Delta   | Miss | Score | Expect  | Rank | Unique | Peptide           |
|---------------------|----------|-----------|-----------|---------|------|-------|---------|------|--------|-------------------|
| <a href="#">233</a> | 639.3407 | 1276.6668 | 1276.7027 | -0.0358 | 0    | 9     | 1.4e+02 | 4    |        | K.LALDIEIATYR.K   |
| <a href="#">253</a> | 665.3858 | 1328.7570 | 1328.7187 | 0.0383  | 0    | 63    | 0.00046 | 1    |        | R.NLGLDLSIIAEVK.A |

11. [K2C7\\_BOVIN](#) Mass: 51546 Score: 69 Matches: 2(1) Sequences: 2(1) emPAI: 0.07  
 Keratin, type II cytoskeletal 7 OS=Bos taurus OX=9913 GN=KRT7 PE=2 SV=1  
 Check to include this hit in error tolerant search

| Query               | Observed | Mr(expt)  | Mr(calc)  | Delta   | Miss | Score | Expect  | Rank | Unique | Peptide           |
|---------------------|----------|-----------|-----------|---------|------|-------|---------|------|--------|-------------------|
| <a href="#">233</a> | 639.3407 | 1276.6668 | 1276.7027 | -0.0358 | 0    | 9     | 1.4e+02 | 4    |        | K.LALDIEIATYR.K   |
| <a href="#">249</a> | 651.8764 | 1301.7383 | 1301.7078 | 0.0305  | 0    | 60    | 0.001   | 1    |        | R.SLGLDLSIIAEVK.A |

12. [PEX1\\_HUMAN](#) Mass: 142778 Score: 44 Matches: 3(1) Sequences: 1(1) emPAI: 0.03  
 Peroxisome biogenesis factor 1 OS=Homo sapiens OX=9606 GN=PEX1 PE=1 SV=1  
 Check to include this hit in error tolerant search

| Query                                                   | Observed | Mr(expt)  | Mr(calc)  | Delta   | Miss | Score | Expect | Rank | Unique | Peptide       |
|---------------------------------------------------------|----------|-----------|-----------|---------|------|-------|--------|------|--------|---------------|
| <input checked="" type="checkbox"/> <a href="#">191</a> | 533.2566 | 1064.4986 | 1064.5358 | -0.0372 | 1    | 44    | 0.042  | 1    | U      | K.GMMKELQTK.Q |
| <input checked="" type="checkbox"/> <a href="#">192</a> | 533.2695 | 1064.5244 | 1064.5358 | -0.0114 | 1    | (19)  | 13     | 1    | U      | K.GMMKELQTK.Q |
| <input checked="" type="checkbox"/> <a href="#">193</a> | 533.2699 | 1064.5252 | 1064.5358 | -0.0106 | 1    | (24)  | 4.4    | 1    | U      | K.GMMKELQTK.Q |

Peptide matches not assigned to protein hits: (no details means no match)

| Query                                                   | Observed | Mr(expt)  | Mr(calc)  | Delta   | Miss | Score | Expect | Rank | Unique | Peptide                                          |
|---------------------------------------------------------|----------|-----------|-----------|---------|------|-------|--------|------|--------|--------------------------------------------------|
| <input checked="" type="checkbox"/> <a href="#">87</a>  | 420.2303 | 838.4460  | 838.3565  | 0.0895  | 0    | 26    | 1.9    | 1    |        | SMGIMVEG + Oxidation (M)                         |
| <input checked="" type="checkbox"/> <a href="#">189</a> | 530.8027 | 1059.5908 | 1059.6176 | -0.0268 | 0    | 24    | 4.7    | 1    |        | LTETIGSIVK                                       |
| <input checked="" type="checkbox"/> <a href="#">155</a> | 487.2774 | 972.5402  | 972.4698  | 0.0704  | 0    | 22    | 8.3    | 1    |        | IENLEPCR                                         |
| <input checked="" type="checkbox"/> <a href="#">100</a> | 428.2297 | 854.4448  | 854.4208  | 0.0241  | 0    | 21    | 6.4    | 1    |        | TFELAMK + Oxidation (M)                          |
| <input checked="" type="checkbox"/> <a href="#">54</a>  | 400.3000 | 798.5854  | 798.5327  | 0.0527  | 1    | 21    | 5.1    | 1    |        | KGGVVIVK                                         |
| <input checked="" type="checkbox"/> <a href="#">178</a> | 517.2678 | 1032.5211 | 1032.5088 | 0.0123  | 0    | 21    | 10     | 1    |        | LTITGNDGDK                                       |
| <input checked="" type="checkbox"/> <a href="#">77</a>  | 414.2280 | 826.4414  | 826.3717  | 0.0697  | 0    | 20    | 7.9    | 1    |        | FPCMVSK + Oxidation (M)                          |
| <input checked="" type="checkbox"/> <a href="#">79</a>  | 414.2395 | 826.4644  | 826.3717  | 0.0927  | 0    | 20    | 8      | 1    |        | FPCMVSK + Oxidation (M)                          |
| <input checked="" type="checkbox"/> <a href="#">71</a>  | 412.7607 | 823.5069  | 823.4262  | 0.0807  | 0    | 18    | 13     | 1    |        | VAASMAFK                                         |
| <input checked="" type="checkbox"/> <a href="#">275</a> | 507.2739 | 1518.8000 | 1518.6845 | 0.1155  | 1    | 16    | 22     | 1    |        | GLENAEQEGGEMGR + Oxidation (M)                   |
| <input checked="" type="checkbox"/> <a href="#">171</a> | 502.2665 | 1002.5185 | 1002.5896 | -0.0711 | 1    | 16    | 29     | 1    |        | VGSGVLIKCK                                       |
| <input checked="" type="checkbox"/> <a href="#">222</a> | 414.2314 | 1239.6723 | 1239.5884 | 0.0839  | 1    | 16    | 25     | 1    |        | ENAESFPKYR                                       |
| <input checked="" type="checkbox"/> <a href="#">147</a> | 472.2926 | 942.5706  | 942.5498  | 0.0207  | 0    | 16    | 30     | 1    |        | TPTVSALVR                                        |
| <input checked="" type="checkbox"/> <a href="#">212</a> | 400.3000 | 1197.8782 | 1197.7445 | 0.1337  | 1    | 16    | 6.1    | 1    |        | LLDGSLLAIKR                                      |
| <input checked="" type="checkbox"/> <a href="#">234</a> | 427.2634 | 1278.7682 | 1278.6456 | 0.1226  | 0    | 16    | 24     | 1    |        | LTEVGVDFGSQK                                     |
| <input checked="" type="checkbox"/> <a href="#">170</a> | 500.2455 | 998.4765  | 998.5760  | -0.0995 | 0    | 16    | 30     | 1    |        | ITPVSQLNK                                        |
| <input checked="" type="checkbox"/> <a href="#">104</a> | 428.7817 | 855.5489  | 855.5178  | 0.0311  | 0    | 16    | 26     | 1    |        | IALLSPSIR                                        |
| <input checked="" type="checkbox"/> <a href="#">166</a> | 498.8123 | 995.6100  | 995.5036  | 0.1064  | 0    | 15    | 28     | 1    |        | EPASGGTLHK                                       |
| <input checked="" type="checkbox"/> <a href="#">179</a> | 517.2799 | 1032.5453 | 1032.5088 | 0.0366  | 0    | 15    | 38     | 1    |        | LTITGNDGDK                                       |
| <input checked="" type="checkbox"/> <a href="#">73</a>  | 413.2000 | 824.3854  | 824.3916  | -0.0061 | 0    | 15    | 22     | 1    |        | TYDLEK                                           |
| <input checked="" type="checkbox"/> <a href="#">78</a>  | 414.2391 | 826.4637  | 826.3717  | 0.0920  | 0    | 14    | 30     | 1    |        | FPCMVSK + Oxidation (M)                          |
| <input checked="" type="checkbox"/> <a href="#">209</a> | 400.3000 | 1197.8782 | 1197.6829 | 0.1953  | 1    | 14    | 8.8    | 1    |        | LEAQRLEAIR                                       |
| <input checked="" type="checkbox"/> <a href="#">295</a> | 897.9324 | 1793.8502 | 1793.9321 | -0.0819 | 0    | 14    | 32     | 1    |        | CLGHLFLSLGMVYLR + Carbamidomethyl (C); Oxidation |
| <input checked="" type="checkbox"/> <a href="#">75</a>  | 414.2174 | 826.4203  | 826.5276  | -0.1073 | 0    | 14    | 35     | 1    |        | LIGQVIGK                                         |
| <input checked="" type="checkbox"/> <a href="#">175</a> | 507.3298 | 1012.6450 | 1012.6029 | 0.0421  | 1    | 14    | 40     | 1    |        | IEAAGGKIVR                                       |
| <input checked="" type="checkbox"/> <a href="#">146</a> | 472.2845 | 942.5545  | 942.4593  | 0.0952  | 0    | 13    | 55     | 1    |        | MQEPAVPR + Oxidation (M)                         |
| <input checked="" type="checkbox"/> <a href="#">103</a> | 428.7813 | 855.5481  | 855.4814  | 0.0667  | 0    | 13    | 45     | 1    |        | IVDVTGPR                                         |





|                                     |     |          |           |           |         |   |   |         |   |                                                  |
|-------------------------------------|-----|----------|-----------|-----------|---------|---|---|---------|---|--------------------------------------------------|
| <input checked="" type="checkbox"/> | 118 | 435.2764 | 868.5382  | 868.4225  | 0.1157  | 0 | 5 | 2.5e+02 | 1 | HMIHTSK + Oxidation (M)                          |
| <input checked="" type="checkbox"/> | 117 | 434.7919 | 867.5692  | 867.4160  | 0.1532  | 0 | 5 | 2.6e+02 | 1 | MNTVPYK + Oxidation (M)                          |
| <input checked="" type="checkbox"/> | 282 | 553.6000 | 1657.7782 | 1657.8709 | -0.0927 | 0 | 5 | 3e+02   | 1 | ILQEAVAVGVGVMDNK + Oxidation (M)                 |
| <input checked="" type="checkbox"/> | 280 | 818.3000 | 1634.5854 | 1634.7149 | -0.1295 | 0 | 5 | 94      | 1 | VHQMTNNINMMCR + 2 Oxidation (M)                  |
| <input checked="" type="checkbox"/> | 97  | 427.3048 | 852.5950  | 852.5181  | 0.0769  | 0 | 5 | 2e+02   | 1 | AGVPAAVIR                                        |
| <input checked="" type="checkbox"/> | 264 | 704.2357 | 1406.4568 | 1406.6435 | -0.1866 | 0 | 5 | 67      | 1 | ASLACSSWPLCR + 2 Carbamidomethyl (C)             |
| <input checked="" type="checkbox"/> | 105 | 431.1000 | 860.1854  | 860.3777  | -0.1922 | 0 | 5 | 23      | 1 | WGDVNR                                           |
| <input checked="" type="checkbox"/> | 94  | 426.2873 | 850.5601  | 850.4041  | 0.1561  | 0 | 5 | 3.2e+02 | 1 | EMVLMGR + Oxidation (M)                          |
| <input checked="" type="checkbox"/> | 145 | 464.2758 | 926.5371  | 926.4821  | 0.0550  | 0 | 5 | 3.6e+02 | 1 | GFNGLDINK                                        |
| <input checked="" type="checkbox"/> | 243 | 432.3000 | 1293.8782 | 1293.7194 | 0.1588  | 1 | 4 | 1.2e+02 | 1 | VFSKPRFQGTK                                      |
| <input checked="" type="checkbox"/> | 106 | 432.1884 | 862.3623  | 862.4661  | -0.1038 | 0 | 4 | 4.6e+02 | 1 | ATAAFNIR                                         |
| <input checked="" type="checkbox"/> | 51  | 400.2415 | 798.4685  | 798.4170  | 0.0515  | 1 | 4 | 2.7e+02 | 1 | ICKHGGK + Carbamidomethyl (C)                    |
| <input checked="" type="checkbox"/> | 134 | 449.2385 | 896.4625  | 896.4208  | 0.0417  | 1 | 4 | 3.4e+02 | 1 | MTMRGASK + Oxidation (M)                         |
| <input checked="" type="checkbox"/> | 173 | 504.2425 | 1006.4704 | 1006.4832 | -0.0128 | 1 | 4 | 4.9e+02 | 1 | KSPFDGSR                                         |
| <input checked="" type="checkbox"/> | 168 | 498.8145 | 995.6144  | 995.5036  | 0.1108  | 0 | 4 | 3.8e+02 | 1 | NSPQASPPAK                                       |
| <input checked="" type="checkbox"/> | 254 | 445.1393 | 1332.3959 | 1332.5728 | -0.1769 | 0 | 4 | 39      | 1 | AAAEQCGGAGVEADR                                  |
| <input checked="" type="checkbox"/> | 223 | 417.2000 | 1248.5782 | 1248.6206 | -0.0424 | 0 | 4 | 4.6e+02 | 1 | SLEMPVIMASR + Oxidation (M)                      |
| <input checked="" type="checkbox"/> | 310 | 702.2326 | 2103.6761 | 2103.8507 | -0.1747 | 0 | 4 | 9.2     | 1 | TMQTSQDSMPMSLNDSGR + 2 Oxidation (M)             |
| <input checked="" type="checkbox"/> | 244 | 432.3000 | 1293.8782 | 1293.6785 | 0.1997  | 1 | 3 | 1.5e+02 | 1 | KMVNILMANTK + 2 Oxidation (M)                    |
| <input checked="" type="checkbox"/> | 245 | 432.3000 | 1293.8782 | 1293.6864 | 0.1918  | 1 | 3 | 1.5e+02 | 1 | TFTGMPRLTVR + Oxidation (M)                      |
| <input checked="" type="checkbox"/> | 182 | 523.1415 | 1044.2685 | 1044.4593 | -0.1908 | 1 | 3 | 46      | 1 | NKHGCDICR                                        |
| <input checked="" type="checkbox"/> | 251 | 441.7954 | 1322.3644 | 1322.5408 | -0.1765 | 1 | 3 | 24      | 1 | EDDAQCGKDSK                                      |
| <input checked="" type="checkbox"/> | 107 | 432.3000 | 862.5854  | 862.4946  | 0.0909  | 1 | 3 | 5.4e+02 | 1 | MALTAATK                                         |
| <input checked="" type="checkbox"/> | 306 | 999.7910 | 1997.5675 | 1997.7376 | -0.1701 | 0 | 3 | 2.2     | 1 | GQCMPVVDGDTYTYGCR + Carbamidomethyl (C); Oxidati |
| <input checked="" type="checkbox"/> | 298 | 463.1590 | 1848.6067 | 1848.7295 | -0.1227 | 0 | 3 | 28      | 1 | GLCNFLMSDEYDDR + Carbamidomethyl (C)             |
| <input checked="" type="checkbox"/> | 283 | 555.6000 | 1663.7782 | 1663.7334 | 0.0448  | 1 | 3 | 4.1e+02 | 1 | CSSCGEGFANTYGLKK                                 |
| <input checked="" type="checkbox"/> | 238 | 430.1498 | 1287.4276 | 1287.6169 | -0.1893 | 0 | 3 | 1.5e+02 | 1 | YTCASIFAEEVK                                     |
| <input checked="" type="checkbox"/> | 137 | 449.3480 | 896.6814  | 896.5444  | 0.1371  | 0 | 3 | 1.6e+02 | 1 | VFVVASVAR                                        |
| <input checked="" type="checkbox"/> | 215 | 402.3000 | 1203.8782 | 1203.7088 | 0.1694  | 0 | 3 | 71      | 1 | ALGAIITHPSIR                                     |
| <input checked="" type="checkbox"/> | 239 | 431.1000 | 1290.2782 | 1290.4461 | -0.1680 | 0 | 3 | 1.7     | 1 | TGNCTCGGCTCK + Carbamidomethyl (C)               |
| <input checked="" type="checkbox"/> | 167 | 498.8137 | 995.6128  | 995.5988  | 0.0140  | 1 | 3 | 5.1e+02 | 1 | RELVRPAR                                         |
| <input checked="" type="checkbox"/> | 126 | 441.8023 | 881.5900  | 881.4025  | 0.1875  | 1 | 3 | 4.8e+02 | 1 | NSRMGSSK + Oxidation (M)                         |
| <input checked="" type="checkbox"/> | 300 | 628.2320 | 1881.6741 | 1881.7864 | -0.1123 | 1 | 2 | 91      | 1 | YGEDEDEEQEEDRK                                   |
| <input checked="" type="checkbox"/> | 138 | 450.2858 | 898.5571  | 898.4218  | 0.1353  | 0 | 2 | 5.9e+02 | 1 | GYMVAAGSK + Oxidation (M)                        |
| <input checked="" type="checkbox"/> | 261 | 463.1571 | 1386.4494 | 1386.6449 | -0.1955 | 0 | 2 | 1.1e+02 | 1 | MSGGYTSLESSIR                                    |
| <input checked="" type="checkbox"/> | 92  | 425.2699 | 848.5252  | 848.4239  | 0.1012  | 1 | 2 | 7.2e+02 | 1 | TEAEKSKK                                         |
| <input checked="" type="checkbox"/> | 232 | 425.7861 | 1274.3364 | 1274.4842 | -0.1478 | 1 | 2 | 25      | 1 | GCKCLSNVYCG + 3 Carbamidomethyl (C)              |
| <input checked="" type="checkbox"/> | 141 | 455.2641 | 908.5137  | 908.5153  | -0.0016 | 1 | 2 | 6.6e+02 | 1 | IKLMFNK + Oxidation (M)                          |
| <input checked="" type="checkbox"/> | 150 | 480.1863 | 958.3581  | 958.4654  | -0.1073 | 0 | 2 | 7.2e+02 | 1 | MAAGAPAAGAR + Oxidation (M)                      |
| <input checked="" type="checkbox"/> | 242 | 432.3000 | 1293.8782 | 1293.6864 | 0.1918  | 1 | 2 | 2.1e+02 | 1 | TFTGMPRLTVR + Oxidation (M)                      |
| <input checked="" type="checkbox"/> | 311 | 703.2455 | 2106.7147 | 2106.9139 | -0.1992 | 0 | 2 | 31      | 1 | GMNDCLPEQSGLWQAEK + Oxidation (M)                |
| <input checked="" type="checkbox"/> | 84  | 417.2000 | 832.3854  | 832.4331  | -0.0476 | 0 | 2 | 7.7e+02 | 1 | YTPPEVK                                          |
| <input checked="" type="checkbox"/> | 149 | 477.3294 | 952.6443  | 952.4462  | 0.1982  | 1 | 2 | 5.4e+02 | 1 | SDGTSKSGSK                                       |
| <input checked="" type="checkbox"/> | 148 | 477.2887 | 952.5629  | 952.4800  | 0.0829  | 0 | 2 | 7.1e+02 | 1 | TYGICGAIR                                        |
| <input checked="" type="checkbox"/> | 70  | 818.3000 | 817.2927  | 817.3970  | -0.1043 | 0 | 2 | 8.9e+02 | 1 | GDEIAWK                                          |
| <input checked="" type="checkbox"/> | 309 | 523.1466 | 2088.5575 | 2088.7347 | -0.1772 | 0 | 1 | 1       | 1 | DCEGSDDEEGCSPPNFTK + Carbamidomethyl (C)         |
| <input checked="" type="checkbox"/> | 115 | 434.2701 | 866.5257  | 866.5086  | 0.0171  | 1 | 1 | 6.7e+02 | 1 | HVNTLKR                                          |
| <input checked="" type="checkbox"/> | 127 | 441.8037 | 881.5928  | 881.4971  | 0.0958  | 0 | 1 | 6.7e+02 | 1 | AATQPAPVK                                        |
| <input checked="" type="checkbox"/> | 320 | 927.4760 | 2779.4063 | 2779.4297 | -0.0235 | 0 | 1 | 4.2e+02 | 1 | VALVSFVIVVIGFLMKPLNMDGK + 2 Oxidation (M)        |
| <input checked="" type="checkbox"/> | 293 | 445.1405 | 1776.5331 | 1776.7276 | -0.1946 | 1 | 1 | 21      | 1 | CTACPGCLQCSHRDR                                  |
| <input checked="" type="checkbox"/> | 128 | 447.3608 | 892.7071  | 892.5382  | 0.1690  | 1 | 0 | 1.1e+02 | 1 | LQKYLTK                                          |
| <input checked="" type="checkbox"/> | 226 | 419.3315 | 1254.9727 | 1254.7772 | 0.1955  | 1 | 0 | 12      | 1 | LARLSSGVALLR                                     |
| <input checked="" type="checkbox"/> | 241 | 431.1135 | 1290.3188 | 1290.5090 | -0.1902 | 1 | 0 | 15      | 1 | ACMHDRCCPK                                       |
| <input checked="" type="checkbox"/> | 229 | 424.3184 | 1269.9334 | 1269.7553 | 0.1781  | 0 | 0 | 97      | 1 | CVVMGIFLVIVK                                     |
| <input checked="" type="checkbox"/> | 129 | 447.3630 | 892.7114  | 892.5130  | 0.1984  | 0 | 0 | 1.2e+02 | 1 | APQPKPK                                          |
| <input checked="" type="checkbox"/> | 1   | 400.2701 | 399.2628  |           |         |   |   |         |   |                                                  |
| <input checked="" type="checkbox"/> | 2   | 400.3000 | 399.2927  |           |         |   |   |         |   |                                                  |
| <input checked="" type="checkbox"/> | 3   | 400.3000 | 399.2927  |           |         |   |   |         |   |                                                  |
| <input checked="" type="checkbox"/> | 4   | 400.3000 | 399.2927  |           |         |   |   |         |   |                                                  |
| <input checked="" type="checkbox"/> | 5   | 400.3000 | 399.2927  |           |         |   |   |         |   |                                                  |
| <input checked="" type="checkbox"/> | 6   | 401.2000 | 400.1927  |           |         |   |   |         |   |                                                  |
| <input checked="" type="checkbox"/> | 7   | 401.5000 | 400.4927  |           |         |   |   |         |   |                                                  |
| <input checked="" type="checkbox"/> | 8   | 402.3000 | 401.2927  |           |         |   |   |         |   |                                                  |
| <input checked="" type="checkbox"/> | 9   | 402.3000 | 401.2927  |           |         |   |   |         |   |                                                  |
| <input checked="" type="checkbox"/> | 10  | 402.3000 | 401.2927  |           |         |   |   |         |   |                                                  |
| <input checked="" type="checkbox"/> | 11  | 402.4000 | 401.3927  |           |         |   |   |         |   |                                                  |
| <input checked="" type="checkbox"/> | 12  | 403.2085 | 402.2013  |           |         |   |   |         |   |                                                  |
| <input checked="" type="checkbox"/> | 13  | 403.2672 | 402.2600  |           |         |   |   |         |   |                                                  |
| <input checked="" type="checkbox"/> | 14  | 404.2116 | 403.2043  |           |         |   |   |         |   |                                                  |
| <input checked="" type="checkbox"/> | 15  | 404.3000 | 403.2927  |           |         |   |   |         |   |                                                  |
| <input checked="" type="checkbox"/> | 16  | 406.2000 | 405.1927  |           |         |   |   |         |   |                                                  |
| <input checked="" type="checkbox"/> | 17  | 406.4000 | 405.3927  |           |         |   |   |         |   |                                                  |
| <input checked="" type="checkbox"/> | 18  | 413.2000 | 412.1927  |           |         |   |   |         |   |                                                  |
| <input checked="" type="checkbox"/> | 19  | 417.2000 | 416.1927  |           |         |   |   |         |   |                                                  |
| <input checked="" type="checkbox"/> | 20  | 417.4000 | 416.3927  |           |         |   |   |         |   |                                                  |
| <input checked="" type="checkbox"/> | 21  | 421.2535 | 420.2462  |           |         |   |   |         |   |                                                  |
| <input checked="" type="checkbox"/> | 22  | 424.2000 | 423.1927  |           |         |   |   |         |   |                                                  |
| <input checked="" type="checkbox"/> | 23  | 425.3268 | 424.3195  |           |         |   |   |         |   |                                                  |
| <input checked="" type="checkbox"/> | 24  | 427.3997 | 426.3924  |           |         |   |   |         |   |                                                  |
| <input checked="" type="checkbox"/> | 25  | 427.3997 | 426.3925  |           |         |   |   |         |   |                                                  |
| <input checked="" type="checkbox"/> | 26  | 431.1000 | 430.0927  |           |         |   |   |         |   |                                                  |
| <input checked="" type="checkbox"/> | 27  | 432.3000 | 431.2927  |           |         |   |   |         |   |                                                  |
| <input checked="" type="checkbox"/> | 28  | 432.3000 | 431.2927  |           |         |   |   |         |   |                                                  |
| <input checked="" type="checkbox"/> | 29  | 432.3000 | 431.2927  |           |         |   |   |         |   |                                                  |
| <input checked="" type="checkbox"/> | 30  | 432.3000 | 431.2927  |           |         |   |   |         |   |                                                  |

|                                     |                     |          |           |
|-------------------------------------|---------------------|----------|-----------|
| <input checked="" type="checkbox"/> |                     |          |           |
| <input checked="" type="checkbox"/> | <a href="#">31</a>  | 432.3000 | 431.2927  |
| <input checked="" type="checkbox"/> | <a href="#">32</a>  | 432.4000 | 431.3927  |
| <input checked="" type="checkbox"/> | <a href="#">33</a>  | 432.4000 | 431.3927  |
| <input checked="" type="checkbox"/> | <a href="#">34</a>  | 434.2735 | 433.2662  |
| <input checked="" type="checkbox"/> | <a href="#">35</a>  | 436.2261 | 435.2188  |
| <input checked="" type="checkbox"/> | <a href="#">36</a>  | 439.3833 | 438.3760  |
| <input checked="" type="checkbox"/> | <a href="#">37</a>  | 444.2171 | 443.2098  |
| <input checked="" type="checkbox"/> | <a href="#">38</a>  | 447.2128 | 446.2055  |
| <input checked="" type="checkbox"/> | <a href="#">39</a>  | 447.2235 | 446.2162  |
| <input checked="" type="checkbox"/> | <a href="#">40</a>  | 456.3204 | 455.3131  |
| <input checked="" type="checkbox"/> | <a href="#">41</a>  | 461.3988 | 460.3915  |
| <input checked="" type="checkbox"/> | <a href="#">42</a>  | 474.2418 | 473.2345  |
| <input checked="" type="checkbox"/> | <a href="#">43</a>  | 484.4113 | 483.4040  |
| <input checked="" type="checkbox"/> | <a href="#">44</a>  | 497.4203 | 496.4130  |
| <input checked="" type="checkbox"/> | <a href="#">45</a>  | 505.3000 | 504.2927  |
| <input checked="" type="checkbox"/> | <a href="#">46</a>  | 514.3000 | 513.2927  |
| <input checked="" type="checkbox"/> | <a href="#">47</a>  | 553.6000 | 552.5927  |
| <input checked="" type="checkbox"/> | <a href="#">48</a>  | 555.6000 | 554.5927  |
| <input checked="" type="checkbox"/> | <a href="#">49</a>  | 640.8000 | 639.7927  |
| <input checked="" type="checkbox"/> | <a href="#">60</a>  | 401.5000 | 800.9854  |
| <input checked="" type="checkbox"/> | <a href="#">64</a>  | 402.4000 | 802.7854  |
| <input checked="" type="checkbox"/> | <a href="#">66</a>  | 404.3577 | 806.7009  |
| <input checked="" type="checkbox"/> | <a href="#">67</a>  | 405.3607 | 808.7067  |
| <input checked="" type="checkbox"/> | <a href="#">69</a>  | 406.4000 | 810.7854  |
| <input checked="" type="checkbox"/> | <a href="#">81</a>  | 414.3249 | 826.6353  |
| <input checked="" type="checkbox"/> | <a href="#">82</a>  | 414.3365 | 826.6585  |
| <input checked="" type="checkbox"/> | <a href="#">85</a>  | 417.4000 | 832.7854  |
| <input checked="" type="checkbox"/> | <a href="#">93</a>  | 425.3822 | 848.7499  |
| <input checked="" type="checkbox"/> | <a href="#">95</a>  | 427.2583 | 852.5020  |
| <input checked="" type="checkbox"/> | <a href="#">98</a>  | 427.3922 | 852.7699  |
| <input checked="" type="checkbox"/> | <a href="#">99</a>  | 427.4029 | 852.7912  |
| <input checked="" type="checkbox"/> | <a href="#">113</a> | 432.4000 | 862.7854  |
| <input checked="" type="checkbox"/> | <a href="#">114</a> | 432.4000 | 862.7854  |
| <input checked="" type="checkbox"/> | <a href="#">119</a> | 435.3790 | 868.7435  |
| <input checked="" type="checkbox"/> | <a href="#">130</a> | 447.3643 | 892.7140  |
| <input checked="" type="checkbox"/> | <a href="#">151</a> | 481.4476 | 960.8806  |
| <input checked="" type="checkbox"/> | <a href="#">159</a> | 491.3412 | 980.6678  |
| <input checked="" type="checkbox"/> | <a href="#">160</a> | 491.4320 | 980.8494  |
| <input checked="" type="checkbox"/> | <a href="#">162</a> | 492.2998 | 982.5850  |
| <input checked="" type="checkbox"/> | <a href="#">185</a> | 525.4447 | 1048.8749 |
| <input checked="" type="checkbox"/> | <a href="#">198</a> | 553.6000 | 1105.1854 |
| <input checked="" type="checkbox"/> | <a href="#">199</a> | 555.6000 | 1109.1854 |
| <input checked="" type="checkbox"/> | <a href="#">217</a> | 402.4000 | 1204.1782 |
| <input checked="" type="checkbox"/> | <a href="#">220</a> | 406.4000 | 1216.1782 |
| <input checked="" type="checkbox"/> | <a href="#">224</a> | 417.4000 | 1249.1782 |
| <input checked="" type="checkbox"/> | <a href="#">230</a> | 424.3284 | 1269.9634 |
| <input checked="" type="checkbox"/> | <a href="#">231</a> | 425.3839 | 1273.1299 |
| <input checked="" type="checkbox"/> | <a href="#">235</a> | 427.4030 | 1279.1871 |
| <input checked="" type="checkbox"/> | <a href="#">237</a> | 428.7784 | 1283.3132 |
| <input checked="" type="checkbox"/> | <a href="#">240</a> | 431.1114 | 1290.3125 |
| <input checked="" type="checkbox"/> | <a href="#">246</a> | 432.3000 | 1293.8782 |
| <input checked="" type="checkbox"/> | <a href="#">247</a> | 432.4000 | 1294.1782 |
| <input checked="" type="checkbox"/> | <a href="#">248</a> | 432.4000 | 1294.1782 |
| <input checked="" type="checkbox"/> | <a href="#">266</a> | 482.0428 | 1443.1066 |
| <input checked="" type="checkbox"/> | <a href="#">271</a> | 498.3782 | 1492.1128 |
| <input checked="" type="checkbox"/> | <a href="#">277</a> | 523.1512 | 1566.4318 |
| <input checked="" type="checkbox"/> | <a href="#">286</a> | 570.3813 | 1708.1220 |
| <input checked="" type="checkbox"/> | <a href="#">288</a> | 431.1177 | 1720.4419 |
| <input checked="" type="checkbox"/> | <a href="#">289</a> | 436.5673 | 1742.2403 |
| <input checked="" type="checkbox"/> | <a href="#">292</a> | 440.5604 | 1758.2123 |
| <input checked="" type="checkbox"/> | <a href="#">302</a> | 640.8000 | 1919.3782 |
| <input checked="" type="checkbox"/> | <a href="#">305</a> | 499.3450 | 1993.3508 |
| <input checked="" type="checkbox"/> | <a href="#">307</a> | 523.1340 | 2088.5067 |
| <input checked="" type="checkbox"/> | <a href="#">308</a> | 523.1348 | 2088.5102 |
| <input checked="" type="checkbox"/> | <a href="#">319</a> | 818.3000 | 2451.8782 |
| <input checked="" type="checkbox"/> | <a href="#">321</a> | 702.2385 | 2804.9250 |

## Search Parameters

Type of search : MS/MS Ion Search  
 Enzyme : Trypsin  
 Variable modifications : [Carbamidomethyl \(C\)](#), [Oxidation \(M\)](#)  
 Mass values : Monoisotopic  
 Protein Mass : Unrestricted  
 Peptide Mass Tolerance :  $\pm 0.2$  Da  
 Fragment Mass Tolerance :  $\pm 0.2$  Da  
 Max Missed Cleavages : 1  
 Instrument type : Default  
 Number of queries : 323

Mascot: <http://www.matrixscience.com/>
