# Supplementary material for: Neuron-associated retroelement-derived protein Arc/Arg3.1 assists in the early stages of alphaherpesvirus infection in human neuronal cells
Source: PubMed Central journal article supplement (PMC11637343; doi:10.1371/journal.pone.0314980), 2024-12-12
Supplement: pone.0314980.s003.pdf [file pone.0314980.s003.pdf]

Fig. 1A

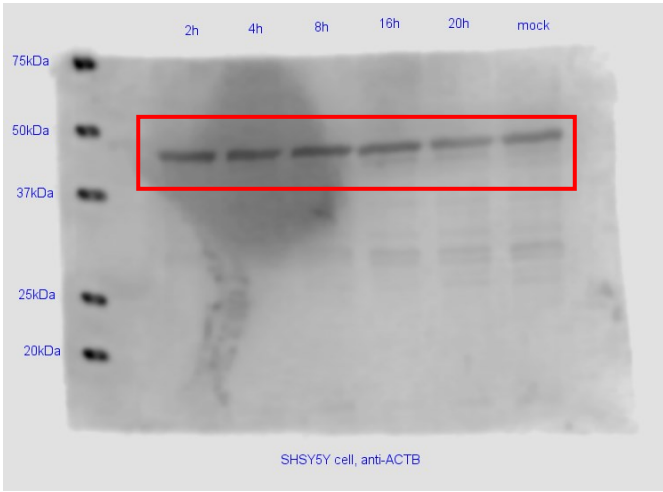

anti-ACTB

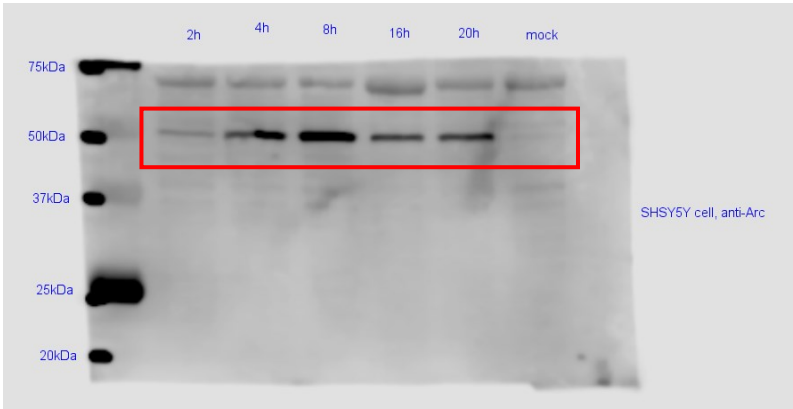

anti-Arc

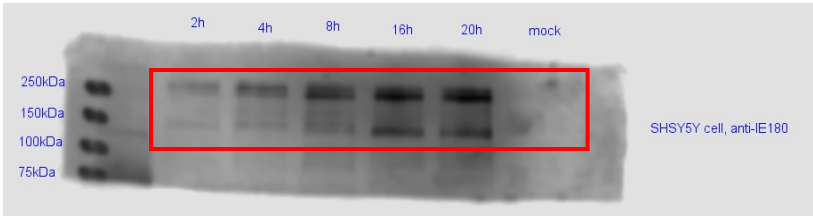

anti-IE180

Fig. 1C

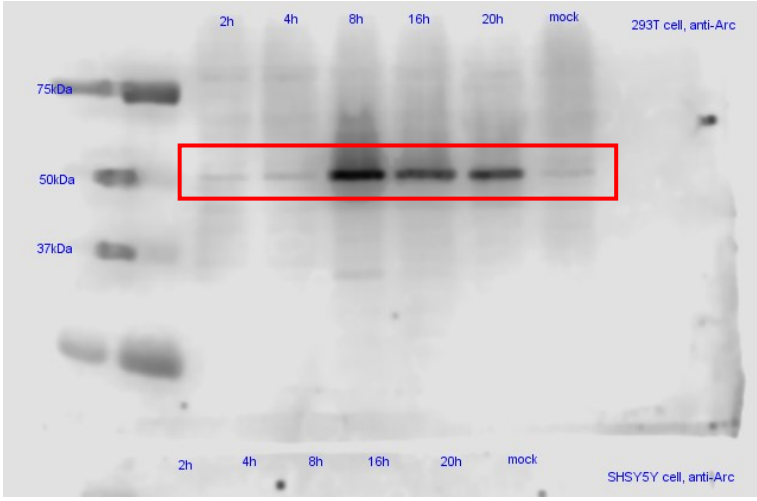

anti-Arc

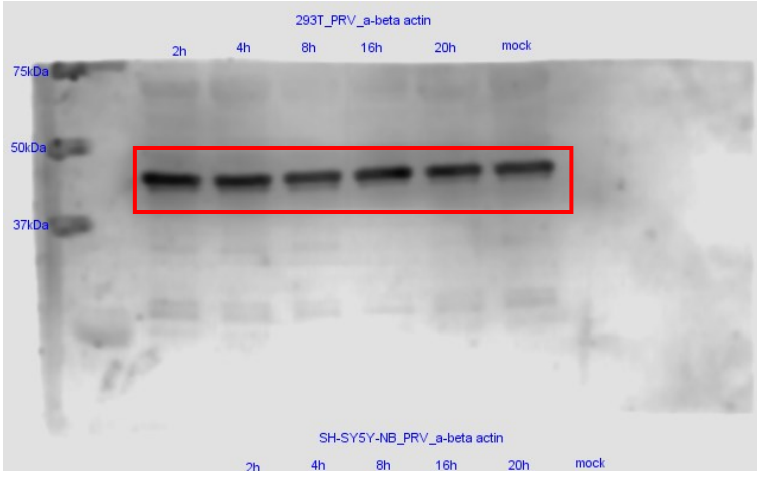

anti-ACTB

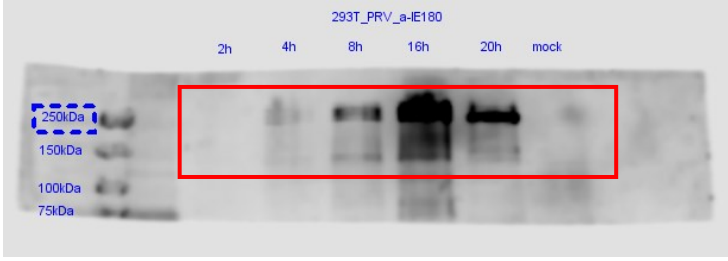

anti-IE180

Fig. 1E

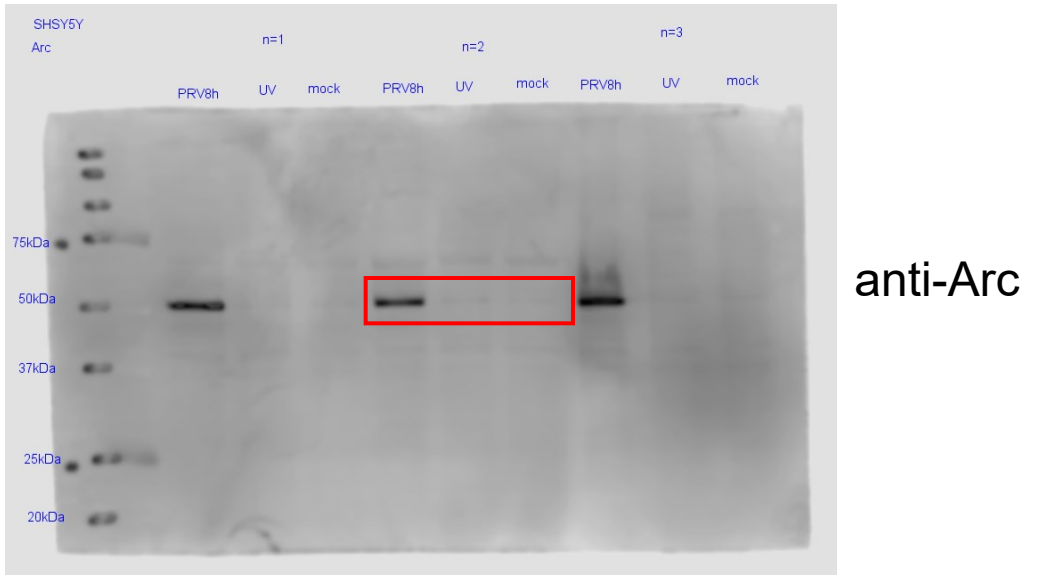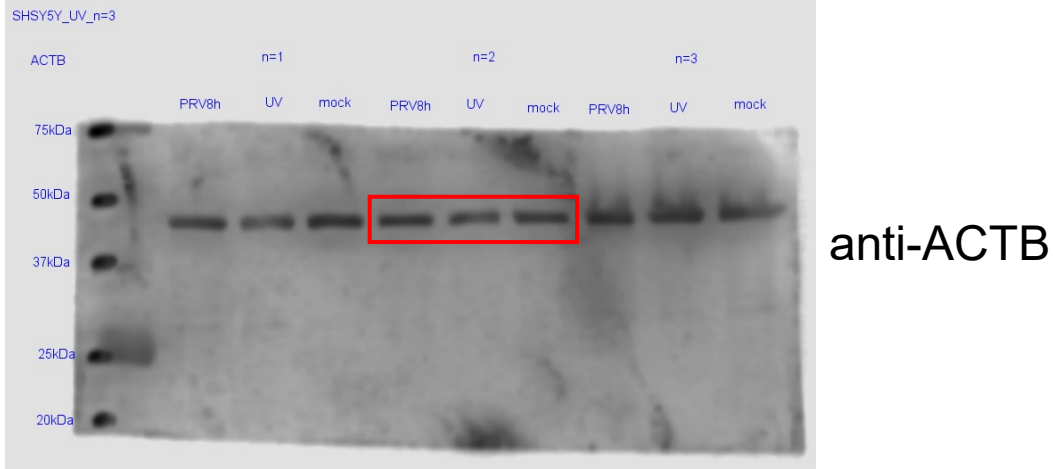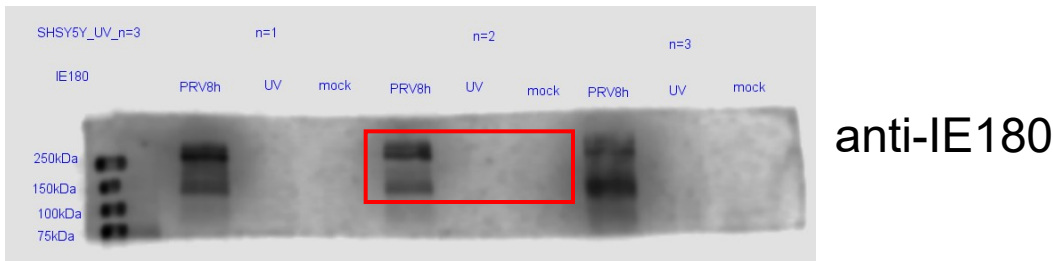

Fig. 1G

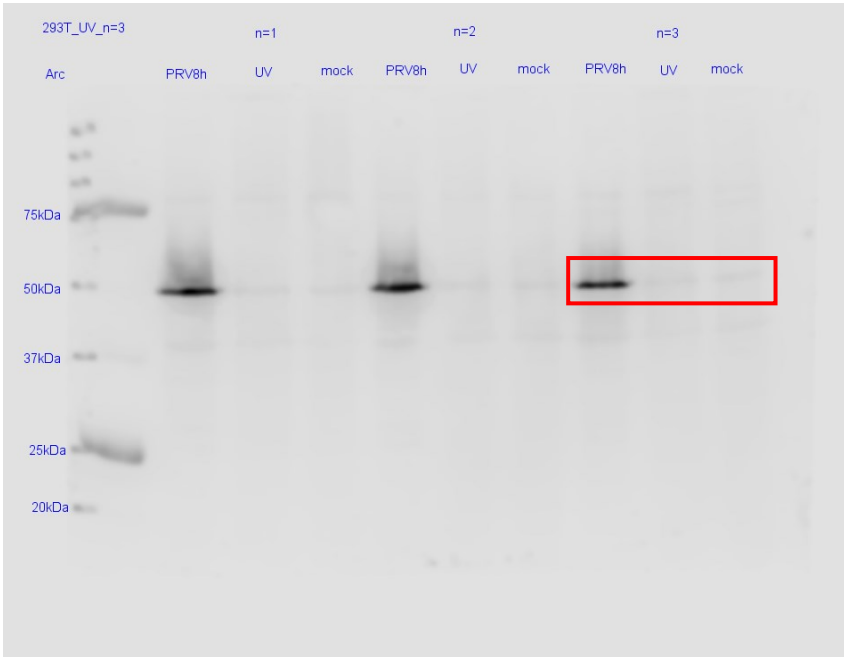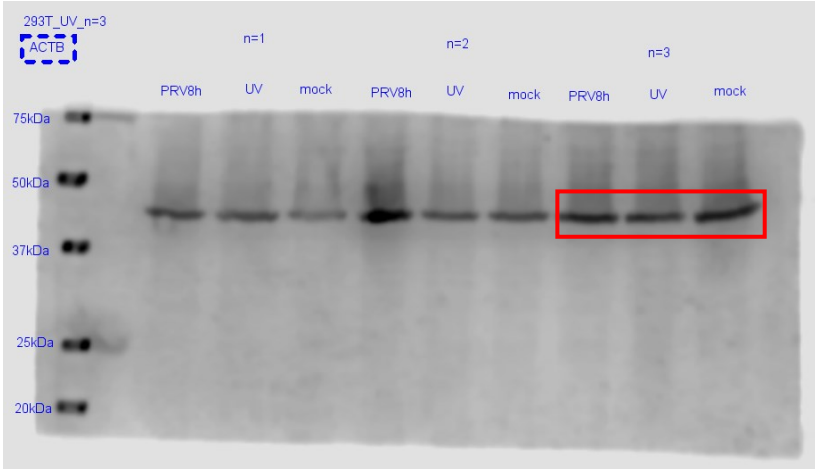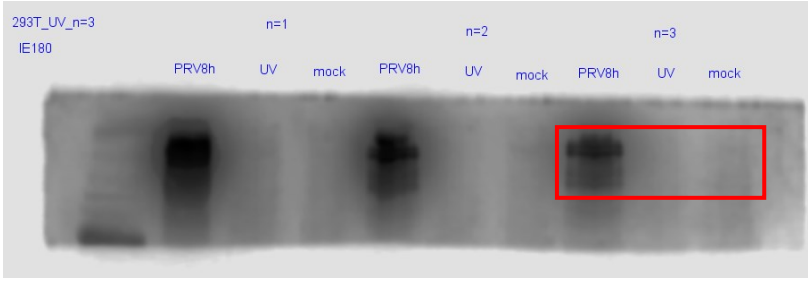

Fig. 2A

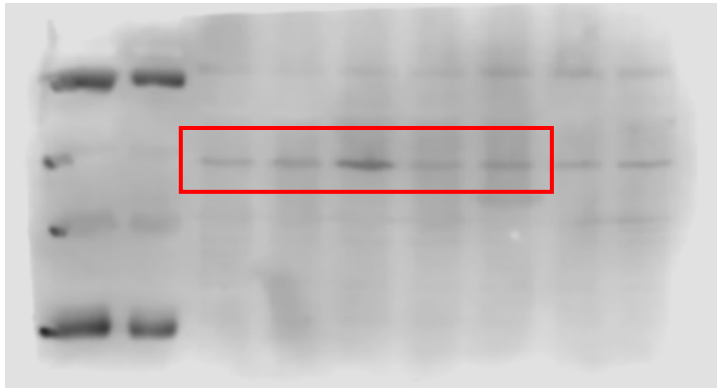

anti-Arc

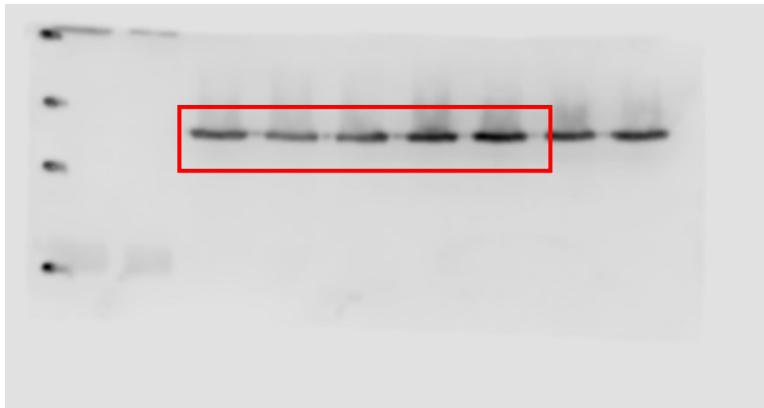

anti-ACTB

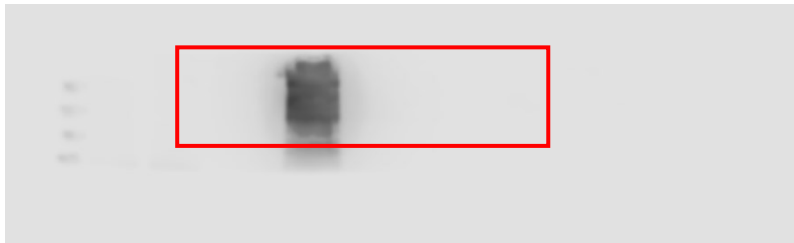

anti-IE180

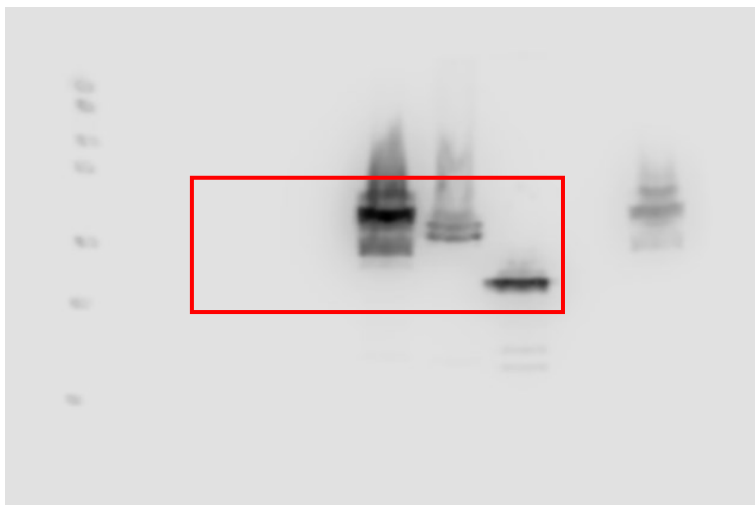

anti-HA

Fig. 2B

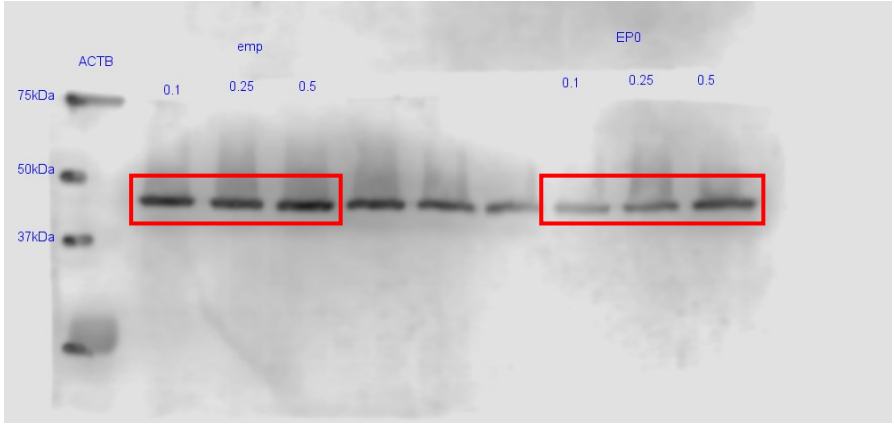

anti-ACTB

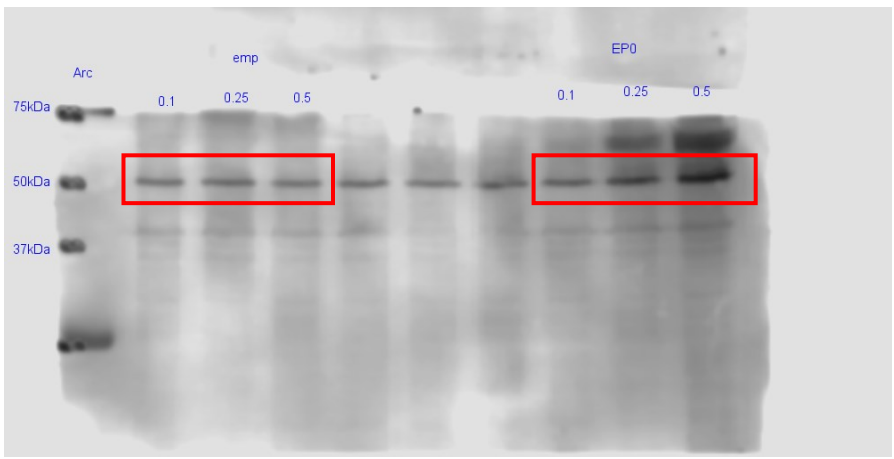

anti-Arc

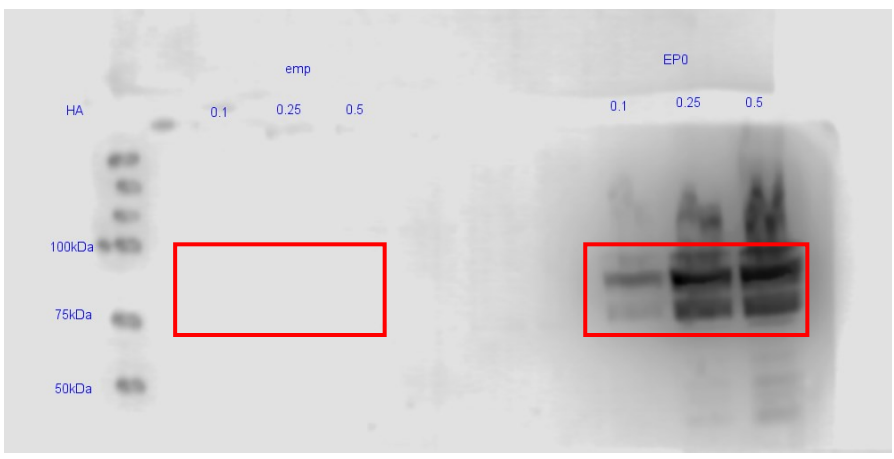

anti-HA

Fig. 2D

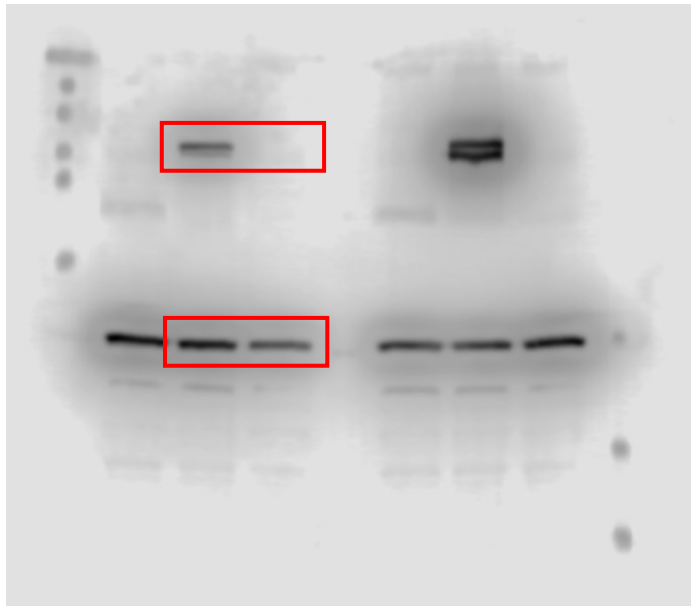

anti-HA

anti-GAPDH

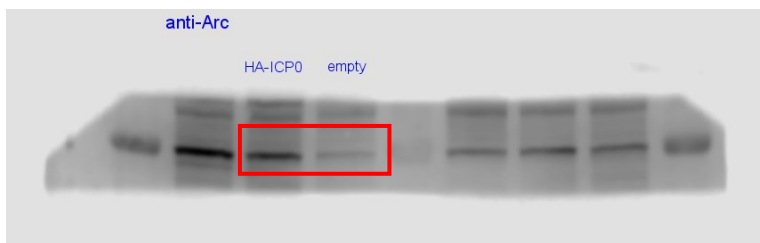

anti-Arc

HA-ICP0 empty

anti-Arc

Fig. 3A

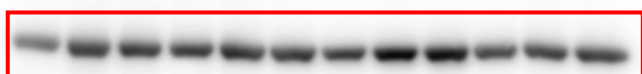

anti-GAPDH

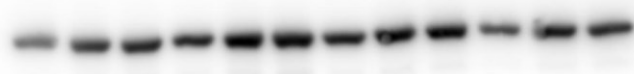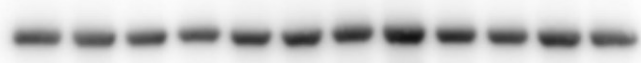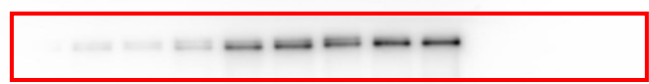

anti-IE180

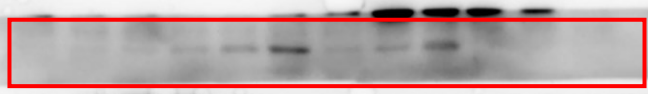

anti-Arc



Fig. 3B

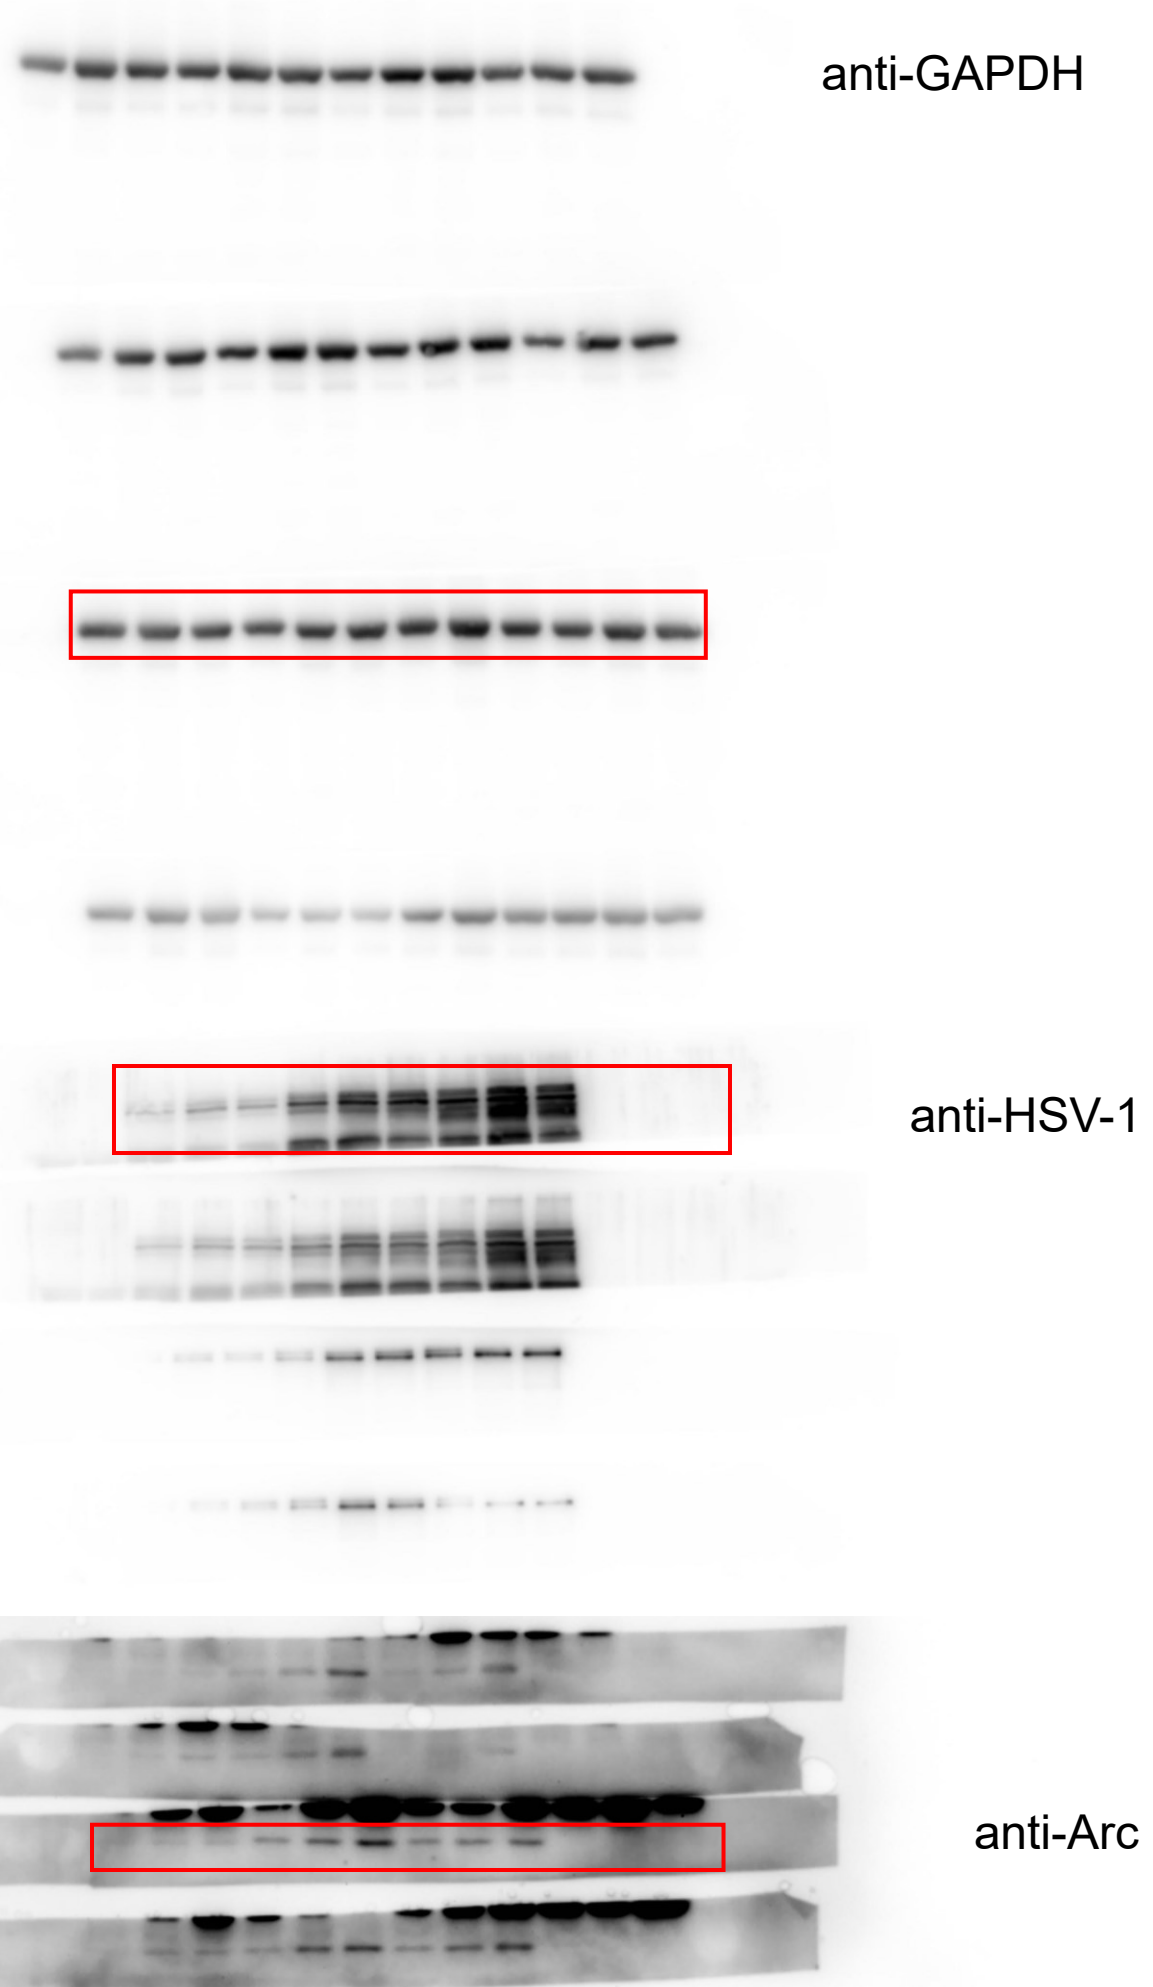

Fig. 4A

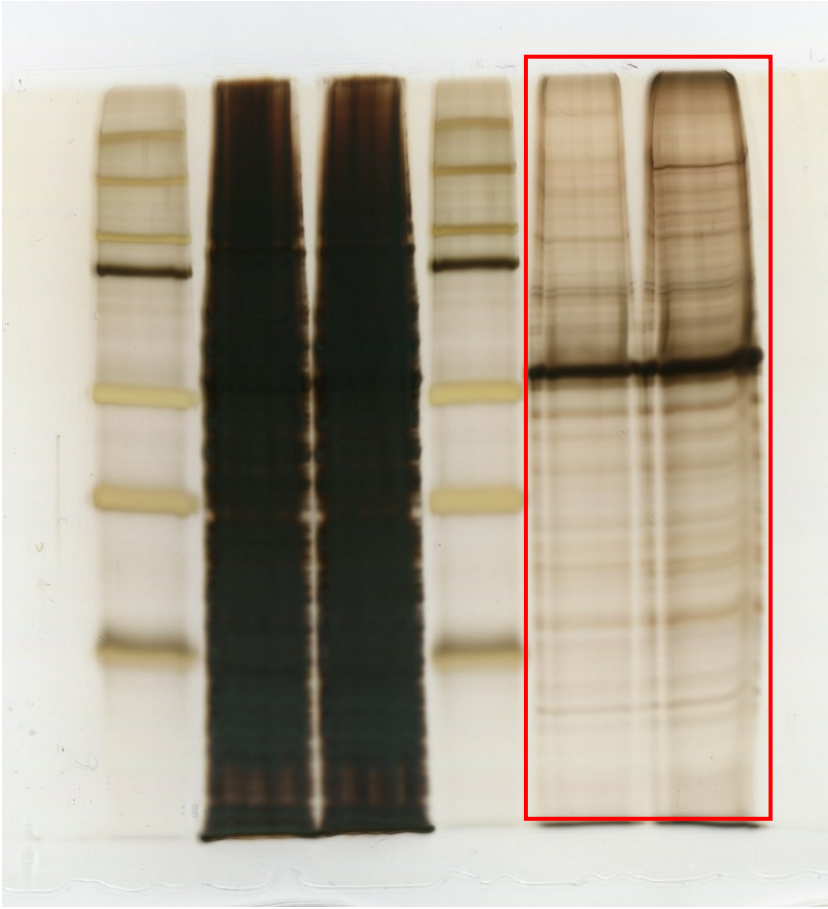

Fig. 4B

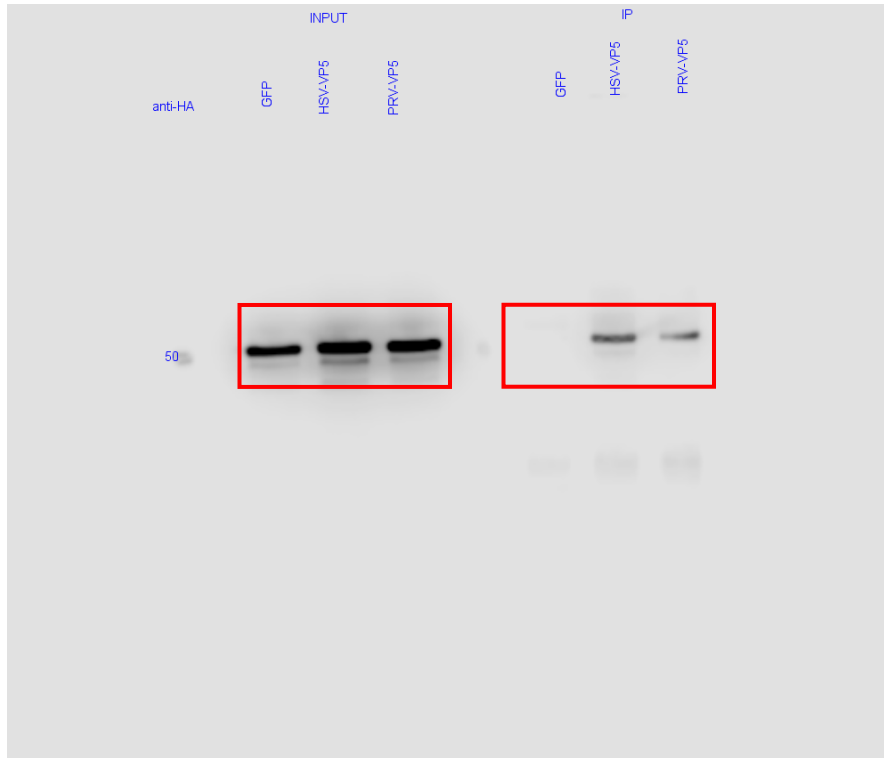

anti-HA (Arc)

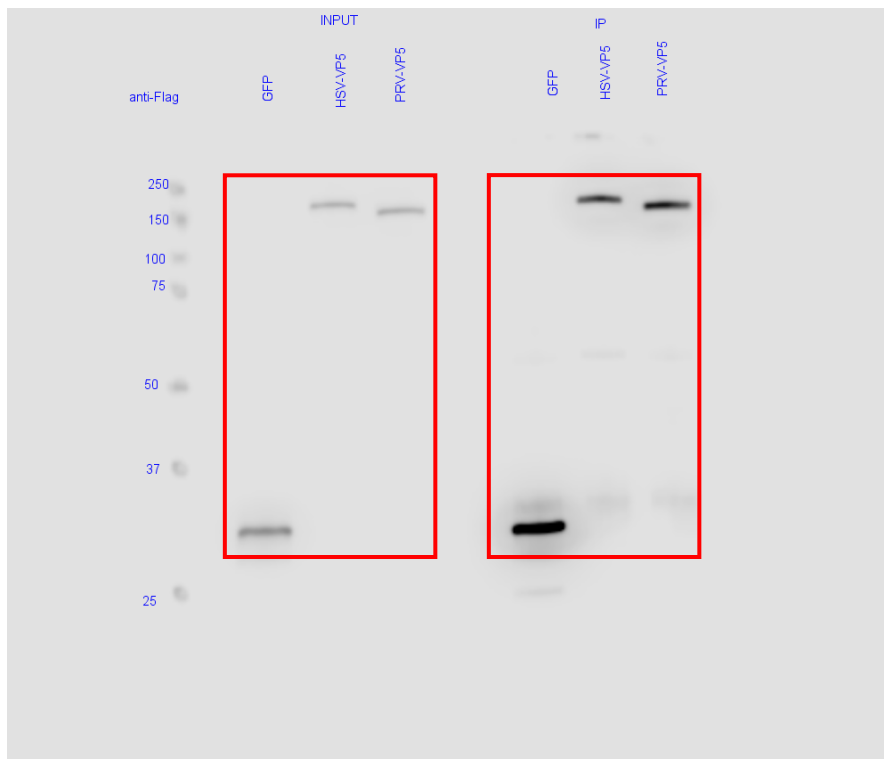

anti-Flag  
(VP5 and GFP)

Fig. 4B

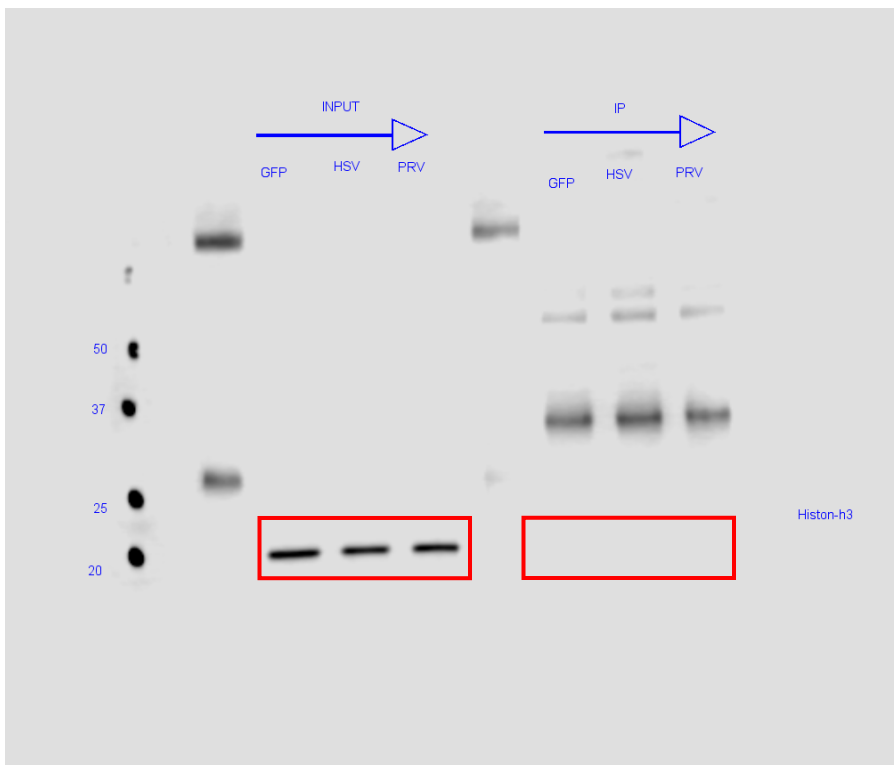

anti-Histone-H3

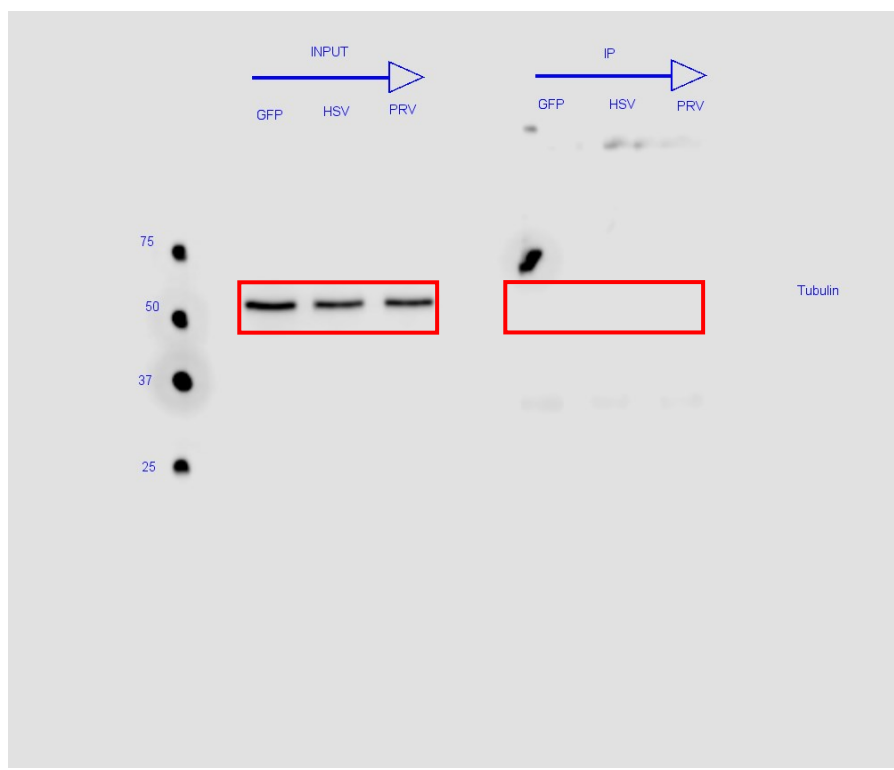

anti-Tubulin
